**Full Title:**

Radical Amino Acid Changes Persist Longer in the Absence of Sex

**Running Title:**

Radical Amino Acid Changes Persist Longer in Asexuals

Joel Sharbrough<sup>1</sup>, Meagan Luse<sup>1</sup>, Jeffrey L. Boore<sup>2</sup>, John M. Logsdon, Jr.<sup>1</sup>, Maurine Neiman<sup>1</sup>

<sup>1</sup> Department of Biology, University of Iowa, 143 Biology Building, Iowa City,

IA 52242, USA

<sup>2</sup> Department of Integrative Biology, University of California, Berkeley 3040 Valley Life

Sciences Bldg #3140, Berkeley CA 94720, USA

**Corresponding author:**

Joel Sharbrough

324 Biology Building

Iowa City, IA 52242, USA

[joel-sharbrough@uiowa.edu](mailto:joel-sharbrough@uiowa.edu)

**Keywords:**

Hill-Robertson effect, mtDNA, sexual reproduction, asexual reproduction,

*Potamopyrgus antipodarum*

**Data Archival Location:**

Sequence data – GenBank

Python scripts – <https://github.com/potamomics-scripts>

## Abstract

Harmful mutations are ubiquitous and inevitable, and the rate at which these mutations are removed from populations is a critical determinant of evolutionary fate. Closely related and otherwise similar sexual and asexual taxa provide a particularly powerful setting in which to study deleterious mutation elimination because sex should facilitate mutational clearance by reducing selective interference between sites. Here, we compared the rate of removal of conservative and radical nonsynonymous mutations in sexual vs. asexual populations of *Potamopyrgus antipodarum*, a New Zealand freshwater snail species featuring coexisting and ecologically similar sexual and asexual lineages. Our analyses revealed that radical changes are removed from populations at significantly higher rates than conservative changes and that sexual lineages eliminate these radical changes more rapidly than asexual counterparts, especially over relatively short time scales. Taken together, these results indicate that reduced efficacy of purifying selection in asexual lineages allows harmful mutations to remain polymorphic longer than in sexual lineages, potentially influencing the outcome of competition between sexual and asexual lineages. The fact that our ability to detect differential patterns of mutational clearance in sexual vs. asexual individuals required polymorphism data emphasizes the critical importance of population-level sampling for characterizing evolutionary phenomena.

## Introduction

One of the primary hypothesized advantages for sexual reproduction is the clearance of harmful mutations, which is expected to be much more effective when linkage disequilibria (LD) are disrupted by sex (Hill and Robertson 1966). A particularly striking and important example of how sex facilitates LD breakdown is provided by the transfer of mitochondrial (mt) genomes to new and potentially divergent nuclear genomic backgrounds from parents (usually but not always mothers; Barr et al. 2005) to sexually produced offspring. The close interactions between nuclear and mt gene products mean that the consequences of breakdown of mitonuclear LD are likely to be substantial. A good example of these consequences is provided by the common observation that changes in nuclear genomic background can substantially decrease mitochondrial function (Ellison and Burton 2006, Meiklejohn et al. 2013, Pichaud et al. 2013), likely a result of coevolution between the mt genome and the nuclear genes that encode the interacting protein subunits of the oxidative phosphorylation (OXPHOS) pathway. Indeed, proper function of these subunits appears to be an important determinant of eukaryotic health (e.g., Chen et al. 2007, Pike et al. 2007, Barreto and Burton 2013, Muir et al. 2016).

**Evolution of mitochondrial genomes in the absence of sex.** With respect to coevolved mitonuclear protein complexes like those found in the OXPHOS pathway, the loss of sex in the nuclear genome is expected to result in at least one of two non-mutually exclusive evolutionary consequences. First, the biparental inheritance and meiotic recombination that the nuclear genome experiences during canonical sexual reproduction will decrease linkage disequilibrium (LD) in both the nuclear and mt genomes, increasing the efficacy of natural selection by decreasing interference from linked sites (Hill and Robertson 1966, Neiman and Taylor 2009).

By contrast, the uniparental (e.g., maternal) inheritance and reduced or absent meiotic recombination that is a feature of asexual reproduction will decrease effective population size ( $N_e$ ) and increase LD across both genomes, decreasing the efficacy of selection by increasing selective interference (i.e., Hill-Robertson effect, Hill and Robertson 1966). More specifically, nuclear and mt genomes “trapped” in asexual lineages are co-transmitted as a single genetic unit, such that the two genomes are effectively linked (Normark and Moran 2000). This scenario underlies the expectation that asexual lineages will accumulate deleterious mutations more rapidly than otherwise similar sexual lineages in both the nuclear (Birky and Walsh 1988, Charlesworth 1993, Lynch et al. 1993) and mt genomes (Normark and Moran 2000, Neiman and Taylor 2009). Because mitonuclear incompatibilities are expected to increase with divergence (Burton and Barreto 2012) and mitonuclear linkage decreases the efficacy of selection (Normark and Moran 2000, Neiman and Taylor 2009), accelerated accumulation of mildly deleterious mutations within asexual lineages should also allow novel mitonuclear combinations, untested by nature, to arise over time.

Second, the absence of sex may allow for elevated rates of mitonuclear coevolution if the co-transmission of mt and nuclear genomes in asexuals allows selection to act more effectively on multilocus (e.g., mitonuclear) genotypes that interact epistatically but tend to be disrupted by recombination (Neiman and Linksvayer 2006). Thus, one important potential consequence of co-transmittance of nuclear and mt genomes in the context of mutation accumulation is that the permanent linkage of these two genomes may allow for relatively strong and effective selection for compensatory mutations in response to accumulated deleterious mutations in OXPHOS genes.

The first scenario (increased mutation accumulation in asexuals) is expected to favor sexual lineages that can effectively remove deleterious mutations, while the second scenario

(tighter coevolution in asexuals) should increase the cost of sex (i.e., recombination load, see Maynard Smith 1978), thereby favoring asexual lineages. Both scenarios are expected to result in more rapid accumulation of nonsynonymous mutations in the mt genomes of asexual lineages than sexual lineages, making it essential to evaluate the relative fitness effects (i.e., deleterious, neutral, or beneficial, and to what extent) of the mutations that accumulate in asexual lineages.

**Differential fitness effects of mutations and the efficacy of selection.** The prediction that the mt genomes of asexuals should experience a higher rate of accumulation of nonsynonymous mutations has found support from animal (Cutter and Payseur 2003, Neiman et al. 2010, Henry et al. 2012) and plant (Horandl and Hojsgaard 2012, Voigt-Zielinsji et al. 2012, Hollister et al. 2015) taxa. While these results represent important steps towards understanding the genomic consequences of asexuality, the evolutionary mechanisms underlying these observations remain unclear, in large part because the extent to which accumulated mutations are actually deleterious in asexuals has not been evaluated. Here, we depart from previous studies assessing mutational load in asexuals that treat all nonsynonymous mutations as a monolithic “deleterious” class (but see Henry et al. 2012) despite evidence that nonsynonymous mutations are likely to vary widely in fitness effects (Keightley and Eyre-Walker 2007). Predicting and characterizing the fitness effects of these nonsynonymous mutations remains a major challenge in evolutionary biology (Keightley and Charlesworth 2005, Xue et al. 2008, Eyre-Walker and Keightley 2009, Halligan et al. 2011). Yet, partitioning nonsynonymous changes into “conservative” changes (amino acid changes in which the derived amino acid has similar biochemical properties to the ancestral amino acid) and “radical” changes (amino acid changes in which the derived amino acid has markedly different biochemical properties compared to the ancestral amino acid) represents a

relatively straightforward method for inferring effects of mutations on protein phenotype (Zhang 2000, Smith 2003, Hanada et al. 2007, Popadin et al. 2007).

Because mutational severity largely governs the efficacy with which selection can act upon any given mutation (Fisher 1930), partitioning nonsynonymous changes into conservative and radical mutational types also allows for an intuitive means of comparing the efficacy of selection in sexual vs. asexual genomes. At present, commonly used methods for inferring selection on DNA sequence data (e.g.,  $\pi$ ,  $\theta$ , Tajima's D,  $d_N/d_S$ , etc.) do not typically incorporate information from the distribution of fitness effects (DFE) of mutations (but see Kryazhimskiy and Plotkin 2008, Schneider et al. 2011). Here, we provide a proof of principle for using mutational information (i.e., radical vs. conservative changes) to infer the type, intensity, and efficacy of selection using traditional tests of selection (e.g., McDonald-Kreitman test of selection,  $\pi$ ,  $\theta$ ,  $K_A/K_S$ ), applied to the mt genomes of sexual vs. asexual snails.

***Potamopyrgus antipodarum*: a snail model for the evolutionary maintenance of sex.** The removal of deleterious mutations (and the fixation of beneficial mutations) depends upon the efficacy of selection as well as the fitness effect of the mutation(s), such that elevated  $N_e$  and reduced LD in sexual vs. asexual populations should result in more rapid removal of deleterious mutations for the former (Birky and Walsh 1988). As such, comparing rates and patterns of evolution across reproductive modes while incorporating DFE information will provide a unique and powerful glimpse into the evolutionary dynamics governing the removal of deleterious mutations. The New Zealand freshwater snail *Potamopyrgus antipodarum* is ideally suited to evaluate this critically important evolutionary process because otherwise similar obligately sexual and obligately asexual *P. antipodarum* frequently coexist within New Zealand lake

populations (Lively 1987, Jokela et al. 1997), enabling direct comparisons across reproductive modes, and, thereby, across lineages that vary in the efficacy of selection. Asexual lineages of *P. antipodarum* are the product of multiple distinct transitions from sexual *P. antipodarum* (Neiman and Lively 2004, Neiman et al. 2011), meaning that these asexual lineages represent separate natural experiments into the consequences of the absence of sex. Neiman et al. (2010) showed that asexual lineages of *P. antipodarum* experience a higher rate of nonsynonymous substitution in their mt genomes than sexual lineages. Here, we use an expanded mt genomic dataset to evaluate whether sexual lineages distinguish between radical and conservative changes more effectively than asexual lineages at interspecific and intraspecific levels. This approach allowed us to evaluate for the first time whether harmful mutation accumulation is visible at the polymorphic level and, if so, whether this phenomenon is driven by more effective selection in sexual lineages vs. relatively rapid mitonuclear coevolution in asexual lineages. The outcome of these analyses emphasizes fundamental differences in the rate of accumulation of conservative vs. radical nonsynonymous mutations and suggests that radical mutations persist longer in mt genomes of asexual lineages of *P. antipodarum* compared to sexual counterparts, likely a consequence of reduced efficacy of purifying selection.

## Materials & Methods

**Sequencing.** We analyzed 31 whole *P. antipodarum* mt genomes from 8 sexual lineages and 23 asexual lineages, representing the natural range of this species in New Zealand along with several invasive lineages (European, North American, see Table S1, Figure 1). Eighteen of these genomes (4 sexual, 14 asexual) were obtained from Genbank (Accession Nos.: GQ996416 – GQ996433), along with the whole mt genome of an outgroup species, *Potamopyrgus estuarinus*

(Accession No.: GQ996415.1) (Neiman et al. 2010). Five mt genomes (2 sexual lineages, 3 asexual lineages) were assembled from the DNA sequence data generated via Illumina technology from the ongoing *P. antipodarum* nuclear genome project. The remaining eight mt genomes (1 sexual lineage, 7 asexual lineages) were newly sequenced via bi-directional Sanger sequencing on an ABI 3730. DNA for the Sanger-sequenced lineages was extracted with a mollusk-adapted phenol-chloroform extraction protocol (Fukami et al. 2004). Mt genomes were amplified in four overlapping fragments using primers and programs designed in Neiman et al (2010). PCR products were cleaned with Shrimp Exo shrimp alkaline phosphatase (Werle et al. 1994) and directly sequenced with internal sequencing primers (Table S2). The newly generated mt genome sequence data were assembled and manually edited in Sequencher 5.0. For these eight newly generated mt genome sequences, only unambiguous sites with  $\geq 2$  Sanger reads were used in our analyses. All new sequences will be deposited in GenBank.

We used flow cytometry (following the protocol outlined in Neiman et al. 2011, Neiman et al. 2012, Paczesniak et al. 2013, Krist et al. 2014) to assign ploidy and thus reproductive mode (diploid – sexual; polyploid – asexual) to the newly sequenced lineages for which ploidy had not already been determined.

**Phylogenetic analysis.** Concatenated mt genome sequences have been shown to produce more accurate tree topologies than single gene trees (Rokas et al. 2003, Gadagkar et al. 2005).

Accordingly, we concatenated nucleotide sequences from ~11 kbp protein-coding nucleotides from each of the 31 *P. antipodarum* lineages and from *P. estuarinus*, for a total of 32 concatenated sequences. The concatenated sequences were aligned in the correct reading frame using the ClustalW package implemented in MEGA 5.2.2 (Kumar et al. 2008) and manually



edited (alignment available upon request). To minimize the effects of selection on tree topology, we used only 3<sup>rd</sup>-position sites to infer the mt genome phylogeny using the maximum likelihood (ML) methods implemented in MEGA 5.2.2 software (Kumar et al. 2008), using the ML model selection tool in MEGA 5.2.2 to select the Tamura-Nei model of molecular evolution with gamma-distributed sites (Tamura and Nei 1993). Tree topology was assessed using 1,000 bootstrap replicates and visualized using FigTree v1.4 (Raumbaut 2007): only nodes with bootstrap support > 60 were relied upon for tests of molecular evolution. The tree topology that we obtained (Figure 1) is qualitatively identical to previously published mitochondrial trees for *P. antipodarum* (Neiman et al. 2004, Neiman et al. 2010, and Paczesniak et al. 2013).

**Quantifying the rate of radical vs. conservative mutation and substitution.** We used seven different amino acid classification schemes drawn from Zhang (2000), Hanada et al. (2007), and a modified Grantham scheme based on amino acid composition, polarity, and volume (Grantham 1974) to evaluate patterns of radical and conservative nonsynonymous polymorphism and substitution in the mt genome of *P. antipodarum* (Table 1). We defined radical mutations as mutations in which the derived amino acid was from a different category than the ancestral amino acid, while conservative mutations were defined as mutations in which the derived amino acid and the ancestral amino acid were in the same category. While there is some overlap between different classification schemes, each scheme highlights different amino acid properties that are likely to shape protein evolution. To wit, amino acid charge is a major determinant of protein folding (Perutz et al. 1965, Anfinsen 1973, Nakashima et al. 1986, Bashford et al. 1987, Wright et al. 2005) and three-dimensional structure (Lesk and Chothia 1980, Geisler and Weber 1982, Doms et al. 1988, Rumbley et al. 2001), and uncharged to charged amino acid changes

(and vice versa) are rarely maintained (see Table S3,  $K_R/K_S$ ). Amino acid polarity is particularly important for proper membrane integration, as phospholipid membranes are highly hydrophobic, and changes between polar and non-polar amino acids may expose or bury key interaction residues (Von Heijne 1992). Volume and aromaticity can both affect protein folding (e.g., proline is a structure breaker) and can play a role in protein-protein interactions (Burley and Petsko 1985). Classification schemes 4 and 7 are unique in that they are based on evolutionary information (although classification scheme 7 largely fits with charge and polarity classifications), meaning that these schemes incorporate aspects of other amino acid characteristics into their classifications. All mutational types were defined relative to the invertebrate mt genetic code (<http://www.ncbi.nlm.nih.gov/Taxonomy/Utils/wprintgc.cgi#SG5>). The number of synonymous, conservative nonsynonymous, and radical nonsynonymous sites per codon are detailed in Table S4.

Because the number of substitutions per site can be used as an estimate of the rate of substitution (Li et al. 1985), we counted the number of nucleotide substitutions and determined the type of substitution (i.e., synonymous, conservative nonsynonymous, and radical nonsynonymous) in the protein-coding regions of the mt genomes (excluding codons with >1 change) of each lineage relative to *P. estuarinus*. We then calculated the number of mutational target sites per lineage for a given type of mutation (see Table S4). To confirm that the number of each of type of site was properly calculated, we checked that the number of nonsynonymous sites and the number of synonymous sites per codon summed to three and that the number of conservative nonsynonymous sites and the number of radical nonsynonymous sites per codon summed to the number of nonsynonymous sites per codon (Hanada et al. 2007). Of particular note is that the “GTG”, “TTG”, “ATT”, “ATC”, and “ATA” codons can all be used as

alternative start codons in invertebrate mt genomes (only the GTG alternative start codon was observed in the present dataset), which we accounted for in our site calculations. We then used custom-built Python scripts (available upon request) to calculate substitution rates for each mutational type and used the Jukes-Cantor correction to account for multiple hits (Jukes and Cantor 1969).

Substitutions between species are generally older than polymorphisms within species (McDonald 1996), such that different analyses implicitly assume particular and distinct time scales (i.e., substitutions: relatively old time scale, hereafter “long time scale”; polymorphisms: relatively recent time scale, hereafter “short time scale”; ratio of polymorphism to divergence – composite of recent and old time scales, hereafter “composite time scale”). We compared the mean rate of conservative nonsynonymous substitution (Jukes-Cantor corrected; number of conservative nonsynonymous substitutions/conservative nonsynonymous site;  $K_C$ ) to the mean rate of radical nonsynonymous substitution (Jukes-Cantor corrected; number of radical nonsynonymous substitutions/radical nonsynonymous site;  $K_R$ ) from each of the seven amino acid classification schemes to the Jukes-Cantor-corrected mean synonymous substitution rate (number of synonymous substitutions/synonymous site;  $K_S$ ) and to one another using pairwise Mann-Whitney U (MWU) tests and the Holm procedure for modified Bonferroni correction for multiple comparisons (Holm 1979). All statistical tests were performed in R (R Core Team 2012). In subsequent analyses, we corrected for systematic across-lineage differences in underlying mutation rate by dividing the estimate of  $K_R$  and  $K_C$  for each lineage by  $K_S$ .

Because polymorphisms within species give rise to divergences between species, and because higher ratios of polymorphism to divergence are indicative of more intense purifying selection (McDonald and Kreitman 1991), we used McDonald Kreitman (MK) tests of selection

to evaluate whether conservative changes were more likely than radical changes to reach fixation using a Fisher's Exact Test (FET) with the Holm modification to the Bonferroni correction for multiple comparisons for each of the seven amino acid categories. As an additional test of the intensity of selection acting on conservative vs. radical changes, we compared the ratios of polymorphism to divergence for conservative vs. radical changes by performing 10,000 bootstrap replicates. *P*-values were inferred by comparing the resulting bootstrap distributions (Efron and Tibshirani 1993) and significance was evaluated using the Holm modification to the Bonferroni correction for multiple comparisons for each of the seven amino acid categories.

Finally, we evaluated nucleotide diversity,  $\pi$  (Tajima 1989), nucleotide heterozygosity,  $\theta$  (Watterson 1975), and Tajima's *D* (Tajima 1989) in conservative vs. radical sites to test whether conservative and radical sites differ at the intraspecific (i.e., relatively recent) level. Polymorphism at sites under more stringent purifying selection will tend to exist at lower relative frequencies than at sites under less stringent purifying selection. To compare these intraspecific measures of molecular evolution in all seven amino acid classification schemes we performed 10,000 bootstrap replicates, inferred *p*-values from the resulting distributions, and evaluated statistical significance using the Holm modification to the Bonferroni correction for multiple comparisons.

**Comparisons between sexual and asexual lineages.** Although our sampling scheme provided a comprehensive picture of the mitochondrial diversity present in *P. antipodarum* (see Figure 1, Neiman and Lively 2004, Neiman et al. 2011, Paczesniak et al. 2013), we lacked the statistical power to use standard Phylogenetic Independent Contrast methods (Felsenstein 1985) to compare sexuals and asexuals while accounting for phylogenetic non-independence. Instead, we

employed custom Python scripts to randomly sample (with replacement) sexual and asexual lineages to compare rates and patterns of conservative and radical nonsynonymous evolution at short, long, and composite time scales. We used 10,000 bootstrap replicates to estimate means and 95% CIs for  $K_C/K_S$ ,  $K_R/K_S$ ,  $P_C/D_C$ ,  $P_R/D_R$ ,  $\pi_C/\pi_S$ ,  $\pi_R/\pi_S$ ,  $\theta_C/\theta_S$ , and  $\theta_R/\theta_S$  in sexual vs. asexual lineages in all seven amino acid classification schemes. We estimated two-tailed  $p$ -values by determining the probability of overlap of the bootstrap distributions and determined statistical significance using the Holm procedure to perform a modified Bonferroni correction for multiple comparisons.

To account for possible effects of differential sampling of sexual ( $n = 8$ ) vs. asexual ( $n = 23$ ) lineages, we used the methods described above to compare rates and patterns of conservative vs. radical molecular evolution across reproductive modes by generating 10,000 bootstrap replicates using equal ( $n = 8$ ) and randomly-chosen-with-replacement, sample sizes for sexual and asexual lineages. The results of this equivalent sampling analysis are depicted in Figure 3 and Table S3.

Because population demography can influence patterns of molecular evolution (Tajima 1989), and because transitions to asexuality and/or the rapid growth expected for a newly-generated asexual lineage might influence important demographic parameters (e.g.,  $N_e$ ; Kaiser and Charlesworth 2009), it is important to account for potential effects of demography when evaluating molecular evolution in sexuals vs. asexuals (Wright and Charlesworth 2001). We dealt with this issue by modifying the Watterson estimator of nucleotide heterozygosity  $\theta$  (Watterson 1975) by calculating the mean number of unique mutations per mt genome in sexuals vs. asexuals,  $\theta_U$ :

$$(1) \quad \theta_U = \frac{S_U}{L a_n}$$

where  $S_U$  is the number of unique polymorphisms (i.e., changes that appear only within a single lineage),  $L$  is the number of mutational target sites, and  $a_n$  is:

$$(2) \quad a_n = \sum_{i=1}^{n-1} \frac{1}{i}$$

in which  $n$  is equal to the number of lineages per reproductive mode. Fu and Li (1993) have shown that  $\theta_U$  is an estimate of nucleotide heterozygosity,  $\theta$ , that only uses the external branch lengths of a population (see equation 18, Fu and Li 1993). We compared the mean number of unique polymorphisms per site for each mutational type across reproductive modes using 95% CIs generated by 10,000 bootstrap replicates (Figure 4, Table S3).

One group of asexual *P. antipodarum* that we included in these analyses is quite genetically distinct (mean pairwise distance between clade A and (clade B, clade C) = 0.035) from other lineages (mean pairwise distance within (clade B, clade C) = 0.013) (Figure 1). Therefore, including clade A may cause us to overestimate the extent of mutation accumulation in asexual *P. antipodarum* as a whole. In order to exclude the possibility that this divergent group of asexual lineages may be driving the observed pattern of amino acid evolution, we repeated the comparisons of molecular evolution with clade A excluded, using the clade B sexuals as an outgroup to clade C (see Figure 1, Table S3).

## Results & Discussion

**Relative harm conferred by conservative vs. radical mutations.** We used ~11 kbp of mt protein-coding sequence representing ~8520 nonsynonymous sites generated from eight sexual and 23 asexual *P. antipodarum* lineages (Table S1, Figure 1) and seven distinct amino acid classification schemes (Table 1) to evaluate the relative harmfulness of radical vs. conservative mutations and address whether reproductive mode influences the rate of accumulation of these

two types of mutations in mt genomes. We quantified the number of each mutation type present across these 31 *P. antipodarum* lineages relative to an outgroup, *P. estuarinus* (Table S1, Figure 1). We detected a total of 35 nonsynonymous fixed differences between these two species (mean conservative nonsynonymous fixed differences = 27.14, SD = 4.49; mean radical nonsynonymous fixed differences = 6.71, SD = 3.59).

Before comparing mutation accumulation across reproductive modes, we established the type and intensity of selection acting on conservative vs. radical changes in the *P. antipodarum* mitochondrial genome. To infer the type and intensity of selection acting on conservative vs. radical changes at a relatively long time scale, we compared the Jukes-Cantor corrected rates of conservative nonsynonymous substitution ( $K_C$ ) and radical nonsynonymous substitution ( $K_R$ ) to the Jukes-Cantor corrected synonymous substitution rate ( $K_S$ ). We found that conservative and radical nonsynonymous substitutions accumulate at significantly lower rates than synonymous substitutions in all amino acid classification schemes (Figure 2A, Table S3). Additionally, conservative amino acid changes contribute to divergence between *P. antipodarum* and *P. estuarinus* significantly more than radical changes (Figure 2A) in each of the seven amino acid classification schemes (MWU:  $p < 0.0001$  for all seven schemes, Table S3). These results indicate that while both conservative and radical mutations are fixed at discernably lower rates than synonymous changes, radical amino acid changes are fixed significantly less often than conservative amino acid changes.

We next compared the ratio of polymorphism to divergence for synonymous, nonsynonymous, conservative, and radical differences by performing MK tests of selection (Figure 2B, Table S3). We calculated the mean number of polymorphisms and divergences across amino acid classification schemes and found that conservative polymorphisms (mean

number of conservative polymorphisms = 122.14, SD = 27.25) and radical polymorphisms (mean number of radical polymorphisms = 63.86, SD = 27.25) were significantly less likely to reach fixation than synonymous polymorphisms (number of synonymous polymorphisms = 619) (FET:  $p < 2.2 \times 10^{-16}$  for both mutational types). We also found that conservative polymorphisms were significantly more likely to contribute to divergence than radical polymorphisms (FET:  $p = 0.049$ , see Table S3 for MK tests of individual amino acid classification schemes). We also compared the mean ratio of polymorphism to divergence for conservative ( $P_C/D_C$ ) vs. radical ( $P_R/D_R$ ) changes using 10,000 bootstrap replicates. We found that mean  $P_R/D_R$  was significantly higher than mean  $P_C/D_C$  by comparing bootstrap distributions ( $p < 0.0002$ , see Table S3 for  $P_C/D_C$  vs.  $P_R/D_R$  of individual amino acid classification schemes). These findings reveal that while both conservative and radical changes appear to be evolving under strong purifying selection in *P. antipodarum* mt genomes, radical nonsynonymous changes are eliminated even more rapidly than conservative nonsynonymous changes.

We next compared nucleotide diversity,  $\pi$ , at synonymous, nonsynonymous, conservative, and radical sites, which provides a picture of the strength and efficacy of selection at a relatively short time scale. Sites under purifying selection are expected to exhibit lower levels of nucleotide diversity than relatively neutral sites (e.g., nonsynonymous vs. synonymous sites, respectively) (Nei and Gojobori 1986). Consistent with this prediction, we used 10,000 bootstrap replicates to compare nucleotide diversity across site types and found that mean nonsynonymous nucleotide diversity ( $\pi_A = 0.0050$ ) was significantly lower than mean synonymous nucleotide diversity ( $\pi_S = 0.066$ ) in *P. antipodarum* ( $p < 0.0002$ , Table S3). Similarly, mean conservative nonsynonymous nucleotide diversity ( $\pi_C = 0.0060$ ) and mean radical nonsynonymous nucleotide diversity ( $\pi_R = 0.0027$ ) were significantly lower than mean  $\pi_S$  ( $p < 0.0002$  for  $\pi_C$  and  $\pi_R$ , see Table S3 for



individual schemes). When correcting for  $\pi_S$  (e.g.,  $\pi_A/\pi_S$ ), we found that mean synonymous-corrected radical nucleotide diversity ( $\pi_R/\pi_S = 0.042$ ) was over two-fold lower than mean synonymous-corrected conservative nucleotide diversity ( $\pi_C/\pi_S = 0.090$ ) ( $p < 0.0002$ , see Table S3 for individual schemes), indicating that radical polymorphisms are maintained at lower frequencies than conservative polymorphisms (Figure 2B, Table S3). Thus, even at a relatively short time scale, radical amino acid changes appear to experience more stringent purifying selection than conservative amino acid changes in *P. antipodarum* mt genomes.

Together, these results are consistent with the expectation that radical mutations are usually more harmful than conservative mutations (Rand et al. 2000, Freudenberg-Hua et al. 2003, Smith 2003, Yampolsky et al. 2005). Our results are important in demonstrating that radical and conservative mutations appear to experience very different histories of selection in natural populations. In particular, we provide some of the first evidence from a non-model system featuring reproductive mode polymorphism (a primary determinant of  $N_e$ ) that there exists more stringent purifying selection on radical vs. conservative mutational types, a pattern detectable even at the intraspecific level. While there is substantial overlap amongst classification schemes, the consistent signal of more stringent purifying selection acting on radical changes is evidence that the grouping strategies employed by each scheme (e.g., charge, polarity, volume, etc.) are founded on important biological properties of amino acids. Our results also emphasize that the relative degree of amino acid change should be an important consideration in evaluating patterns of selection and suggest that the standard grouping of radical and conservative mutational types into a monolithic “nonsynonymous” class is often overly simplistic and may be positively misleading (for an example, see Summary & Implications).

Comparisons across long, short, and composite time scales (e.g., substitution rates vs. nucleotide diversity vs. ratio of polymorphism to divergence) reveal qualitatively similar results across all three time scales (Figure 2). In particular, radical changes clearly experience a higher intensity of purifying selection than do conservative changes, indicating that radical changes usually impart substantially more severe fitness effects than conservative changes and should thus return to mutation-selection-drift equilibrium more rapidly than their conservative counterparts (Figure 2, Fisher 1930). As such, we can use comparisons of these two mutational types across different time scales to compare the efficacy with which sexual vs. asexual lineages remove relatively mild (i.e., conservative) and relatively severe (i.e., radical) deleterious mutations.

**Estimating the efficacy of purifying selection in sexuals vs. asexuals.** To estimate the relative differences in rates of evolution in sexual vs. asexual lineages of *P. antipodarum* over a relatively long time scale, we compared synonymous substitution rates ( $K_S$ ), conservative nonsynonymous substitution rates ( $K_C$ ), and radical nonsynonymous substitution rates ( $K_R$ ) for sexuals vs. asexuals using 10,000 bootstrap replicates. We found that mean  $K_S$  of asexual *P. antipodarum* is significantly higher than  $K_S$  of sexual *P. antipodarum* ( $p < 0.0002$ ), indicating that asexual *P. antipodarum* experience a higher rate of synonymous substitution than sexuals (Table S2; see also Neiman et al. 2010). To account for this difference, we corrected estimates of  $K_C$  and  $K_R$  by  $K_S$  and then compared  $K_C/K_S$  (mean sexual = 0.021, mean asexual = 0.022) and  $K_R/K_S$  (mean sexual = 0.0059, mean asexual = 0.0063) across reproductive modes using 10,000 bootstrap replicates. While we did not detect significant differences between sexual and asexual  $K_C/K_S$  or  $K_R/K_S$  ( $p = 0.061$  and  $p = 0.18$ , respectively, Table S3), we did recapitulate Neiman et

al. (2010) in detecting significantly higher  $K_A/K_S$  in asexuals vs. sexuals ( $p = 0.0034$ ). Thus, by subdividing the number of substitutions into conservative and radical categories, we likely lost substantial power in our ability to detect differences across reproductive modes. This explanation is especially likely considering there are only a total of 35 nonsynonymous fixed differences between the *P. antipodarum* and *P. estuarinus* mt genome sequences. Absence of evidence for significant differences in the conservative and radical substitution rates might also be linked to the relatively recent and multiple derivations of asexuality in *P. antipodarum* (Neiman and Lively 2004, Paczesniak et al. 2013). Indeed, our results suggest that the resolution with which two groups of organisms (e.g., sexual vs. asexual) can be differentiated with substitutions might decrease with increasing divergence from the outgroup. In other words, a large class of deleterious mutations that are still evident on the intraspecific level have long since disappeared at the interspecific level, rendering them invisible to methods of quantifying mutation accumulation that only focus on divergence.

To compare the efficacy of selection in different sexuals vs. asexuals at a composite time scale, we compared the mean ratios of polymorphism to divergence for conservative ( $P_C:D_C$ ) and radical ( $P_R:D_R$ ) changes across reproductive modes in all seven amino acid classification schemes. Because our sample included an unequal number of sexual lineages ( $n = 8$ ) compared to the number of asexual lineages ( $n = 23$ ), and because the number of polymorphisms increases with sample size, we performed pairwise comparisons of  $P_C:D_C$  and  $P_R:D_R$  across reproductive modes by performing 10,000 bootstrap replicates of eight randomly sampled (with replacement) sexual lineages and eight randomly sampled (with replacement) asexual lineages. While sexual and asexual lineages exhibited significantly lower mean  $P_C:D_C$  than  $P_R:D_R$  ( $p = 0.0080$  and  $p = 0.0082$ , respectively), the fact that mean sexual  $P_C:D_C$  is significantly lower than mean asexual

$P_R D_R$  ( $p = 0.0010$ ), but that mean asexual  $P_C D_C$  is statistically indistinguishable from mean sexual  $P_R D_R$  ( $p = 0.11$ , Figure 3, see Table S3 for individual classification schemes) indicates that the probability of radical polymorphisms proceeding to fixation is higher in asexual lineages than in sexual lineages. These results from a composite time scale are consistent with sexual lineages eliminating radical, but not conservative, polymorphisms more rapidly than asexual lineages.

We next compared nucleotide diversity ( $\pi$ ) and nucleotide heterozygosity ( $\theta$ ) across reproductive modes using 10,000 bootstrap replicates. To account for differential effects of neutral processes (e.g., demographic changes, mutation rate, *etc.*) on nucleotide diversity in sexuals vs. asexuals (Charlesworth and Wright 2001, Kaiser and Charlesworth 2009), and because sexual  $\pi_S$  was significantly lower than asexual  $\pi_S$  ( $p = 0.011$ , Table S3), we corrected  $\pi_C$  and  $\pi_R$  by dividing each value by  $\pi_S$ . Similarly, because asexuals exhibited significantly higher  $\theta_S$  than sexual lineages ( $p = 0.013$ , Table S3), we corrected estimates of  $\theta_C$  and  $\theta_R$  by dividing by  $\theta_S$ . We did not find any significant differences in mean  $\pi_C/\pi_S$ ,  $\pi_R/\pi_S$ ,  $\theta_C/\theta_S$ , or  $\theta_R/\theta_S$  between sexuals and asexuals (Table S3), indicating that sexual and asexual *P. antipodarum* harbor similar numbers of conservative and radical polymorphisms and at similar relative frequencies. At face value, these results are consistent with a scenario in which sexual and asexual lineages experience similar efficacies of selection. What must be taken into account, however, is that at the time of asexual origin, only a single founding mt genome is transmitted to a newly asexual lineage. The consequence of this bottleneck at the transition to a new asexual lineage is that ancestrally polymorphic sites become immediately monomorphic *within* the new asexual lineage. This phenomenon should cause rapid changes in allele frequencies and thus, changes in frequency-dependent measures of polymorphism (e.g.,  $\pi$ ) of the sampled population. The

implications are that such comparisons of nucleotide diversity and heterozygosity between sexuals and asexuals do not necessarily provide a complete or accurate picture of evolutionary processes.

To account for changes in allele frequency caused by the transition to asexuality itself, we compared the mean number of unique polymorphisms per genome (see Methods) across reproductive modes. By sampling only unique polymorphisms (i.e., relatively new mutations), we were able to estimate mutation accumulation *since* the transition to asexuality. Sexuals and asexuals did not differ in terms of the mean number of unique synonymous polymorphisms per site ( $\theta_{U-S}$ ), indicating that new mutations arise at similar rates across reproductive modes (Figure 4). Sexuals exhibited significantly lower mean  $\theta_{U-R}/\theta_{U-S}$  than  $\theta_{U-C}/\theta_{U-S}$  ( $p < 0.0002$ ), while  $\theta_{U-C}/\theta_{U-S}$  and  $\theta_{U-R}/\theta_{U-S}$  were statistically indistinguishable in asexual lineages ( $p = 0.75$ ), indicating that selection recognizes and removes deleterious changes more rapidly in sexual lineages than in asexual lineages (Figure 4, see Table S3 for individual classification schemes). Further, these results indicate that differences in the efficacy of selection across reproductive modes become apparent relatively quickly after the transition to asexuality, especially with respect to mutational changes with relatively large selection coefficients (i.e., radical mutations).

One group of asexuals was particularly genetically distinct relative to the rest of the *P. antipodarum* dataset (clade A, Figure 1), raising the question of whether this group might be contributing disproportionately to our observations of slowed radical mutation elimination in asexual *P. antipodarum*. We addressed this possibility by performing the same analyses described above on a subsample of *P. antipodarum* lineages (clade C) but treated the clade B sexuals as an outgroup (see Methods, Table S3) and excluded clade A entirely. The results of this more limited analysis are largely consistent with the outcomes of analyses from the whole

dataset (Table S3), indicating that the inclusion of the relatively divergent asexual clade A did not substantively affect the original analysis. Notably, sexual lineages in clade C maintain radical polymorphisms as significantly lower frequencies than conservative polymorphisms (mean  $\pi_C/\pi_S = 0.11$ , mean  $\pi_R/\pi_S = 0.058$ ,  $p < 0.0002$ , see Table S2 for individual classification schemes), while conservative and radical polymorphisms were maintained at statistically indistinguishable levels in clade C asexual lineages (mean  $\pi_C/\pi_S = 0.13$ , mean  $\pi_R/\pi_S = 0.082$ ,  $p = 0.27$ , see Table S2 for individual classification schemes), consistent with ineffective selection in asexual lineages contributing to the retention of radical polymorphisms.

**Summary & Implications.** Asexual *P. antipodarum* have already been found to exhibit elevated accumulation of nonsynonymous substitutions in their mt genomes relative to sexual *P. antipodarum* (Neiman et al. 2010). Here, we provide evidence that asexual *P. antipodarum* exhibit elevated ratios of polymorphism to divergence for radical changes and harbor more unique radical polymorphisms than sexuals, a particularly harmful type of nonsynonymous mutation. Our analyses of the relative effects of conservative vs. radical changes provide a novel line of evidence that the mutations these asexual lineages are accumulating are deleterious. Together, these findings indicate that asexual lineages of *P. antipodarum* likely experience an increased rate of accumulation of harmful mutations than sexual conspecifics, a pattern that is observable at both relatively long (substitution) (Neiman et al. 2010, present study) and relatively short (polymorphism) time scales (present study).

Radical mutations appear more likely to be deleterious than conservative mutations and asexual *P. antipodarum* appear to be accumulating these mutations more rapidly than sexual *P. antipodarum*, raising the intriguing possibility that asexual *P. antipodarum* might exhibit

decreased mitochondrial function compared to sexual counterparts. The presumed severity of some mutations in these genomes (e.g., a nonsense mutation in *nd2* of one asexual lineage that would truncate ND2 by three amino acids) suggests that either mitochondrial function is decreased in at least some asexual lineages or that asexuals possess one or more mechanisms to compensate for deleterious mutation load (e.g., RNA editing). RNA editing of mt-encoded transcripts has been observed in a variety of plant taxa (Covello and Gray 1989, Gualberto et al. 1989) and in land snail mt-encoded tRNAs (Yokobori and Paabo 1995), but it is unclear whether *P. antipodarum* employs similar strategies. Future work evaluating mitochondrial function at the organelle and organismal levels in *P. antipodarum* will be essential to understanding how the efficacy of selection influences the maintenance and distribution of sex in this system.

Our study also provides a clear demonstration of a situation where inclusion of all nonsynonymous changes in a monolithic “deleterious” category can obscure important evolutionary dynamics, especially at the polymorphic level. A particularly illuminating example of the potential for this type of grouping to result in misleading conclusions is that when nonsynonymous changes are treated as a single group, the number of unique nonsynonymous mutations per genome ( $\theta_{U-A}/\theta_{U-S}$ ) in sexual vs. asexual lineages is statistically indistinguishable, in stark contrast to the clear distinctions between sexual and asexual *P. antipodarum* that are revealed by taking mutational effect into account. The implications are, that by partitioning mutations into conservative and radical bins, we gain substantial resolution at the intraspecific level. Similarly, we find that sexual and asexual P/D ratios are statistically indistinguishable if all nonsynonymous mutations are grouped together. At a longer time scale (i.e., divergence), the relative dearth of radical nonsynonymous changes appears to present temporal sampling issues,

such that differences between sexual and asexual *P. antipodarum* can no longer be detected. This result highlights the importance of representative intraspecific sampling and analysis.

While we interpret these results as resulting from less effective selection in asexual lineages, another possible (and non-mutually exclusive) explanation is that the co-transmission (and thus, effective linkage) between the nuclear and mt genomes in asexuals has facilitated the persistence and spread of beneficial nonsynonymous mutations via selection imposed by cooperation with nuclear-encoded genes (Blier et al. 2001, Meiklejohn et al. 2007). Because asexuals co-transmit their nuclear and mt genomes, mutations in either genome may cause decreases in mitochondrial function. Therefore, long-term co-transmission of the nuclear and mt genomes may provide a scenario in which asexuals experience relatively strong selection favoring compensatory mutation(s). We have not detected any evidence of positive selection acting in the mt genome of *P. antipodarum* (e.g., codon-by-codon  $d_N/d_S < 1$ , Neutrality Index  $> 1$  for all 13 protein-coding genes, sliding window  $\pi_A/\pi_S < 1$  at all sites, data not shown), though indirect evidence that a particular mt haplotype is spreading amongst asexual lineages hints that selection favoring particular mt haplotypes or mitonuclear combinations might be involved (Paczynski et al. 2013). Evaluation of rates and patterns of evolution in the nuclear-encoded mt genes that make up  $\geq 95\%$  of the genes that influence mitochondrial function (Sardiello et al. 2003), coupled with the functional analyses mentioned above, will ultimately be needed to determine whether mitonuclear linkage in asexuals is at least in part responsible for elevated retention of apparently harmful mutations in mt genomes.

Our results taken from different time points in the *P. antipodarum* evolutionary history lead us to conclude that patterns of protein evolution in this species are being driven both by mutational severity and reproductive mode. In particular, at the shortest time scale (i.e., number



of unique polymorphisms), sexuals and asexuals differ in the number of radical but not conservative changes. At an older though still population-level scale (i.e., nucleotide diversity for clade C only), radical polymorphisms reside at higher frequencies in asexuals rather than sexuals. Differences across reproductive modes disappear at even older time scales (i.e., species-wide nucleotide diversity, rates of substitution), although the composite time scale revealed that asexuals have higher ratios of polymorphism to divergence than sexuals, particularly with respect to radical changes. While these observations might appear inconsistent, the implicit time scale assumption of each respective measurement instead hints that the selective process plays out at different rates in sexuals vs. asexuals. Namely, our data indicate that mutations in asexuals experience smaller  $N_e|s|$  than in sexuals, meaning that the elimination of apparently deleterious mutations occurs more slowly in asexual than in sexual lineages. Theoretical (Ohta 1987, Charlesworth et al. 1993, Charlesworth and Wright 2001) and empirical (Wright et al. 2008, Katju et al. 2015) work support this conclusion, in that populations with low  $N_e$  are expected to harbor a larger proportion of “effectively neutral” mutations than populations with large  $N_e$ . Our data are consistent with this phenomenon, revealing that amino acid-changing mutations (especially radical changes) in the mt genome remain polymorphic longer in asexual than in sexual lineages, an observation only possible with a multiple time scales approach.

Ultimately, less efficient removal of deleterious mutations in asexual lineages is only important to the maintenance of sex and/or the persistence of asexual lineages if those mutations in fact negatively affect fitness. Recent empirical evidence suggests that harmful mutations indeed play a role in asexual lineage deterioration: Tucker et al. (2013) found that obligately asexual *Daphnia* suffer from gene conversion-type processes that decrease heterozygosity and subsequently expose deleterious recessive alleles, leading to lineage deterioration (Tucker et al.

2013). By contrast, our data indicate that asexual *P. antipodarum* harbor elevated numbers of deleterious mutations due to less efficient removal of existing mutations rather than accelerated acquisition of new mutations. Because mt genotype is critically important to organismal function and fitness (Ellison and Burton 2006, Meiklejohn et al. 2013, Pichaud et al. 2013, Muir et al. 2016), this increased load of likely harmful mutations could potentially contribute to negative phenotypic consequences in asexuals, though slowed deleterious mutation removal in asexuals would likely also need to be prevalent in the nuclear genome in order to provide the short-term advantages necessary to maintain sexual reproduction within a population (Lynch et al. 1993). Given that the nuclear genome is the site of the vast majority of gene content and recombination in sexual lineages, our observation of elevated retention of deleterious mutations in mt genomes of asexual *P. antipodarum* leads us to predict that the nuclear genome is also likely to exhibit substantial differences in deleterious mutational load and efficacy of selection across reproductive modes.

## Acknowledgements

We thank Cindy Toll and Gery Hehman for their assistance with DNA sequencing. We also thank Stephen I. Wright and Aneil F. Agrawal for helpful discussions regarding interpretation of intraspecific data. We thank Samuel J. Fahrner for helpful discussions regarding non-parametric bootstrapping. We thank anonymous reviewers who saw previous versions of this manuscript for their helpful comments. The National Science Foundation (NSF: MCB – 1122176; DEB – 1310825) and the Iowa Academy of Sciences (ISF #13-10) funded this research.

## Literature Cited

597 Anfinsen, C. B. 1973. Principles that govern the folding of protein chains. *Science* 181:  
598 223-230.

599 Barr, C. M., M. Neiman, and D. R. Taylor. 2005. Inheritance and recombination of  
600 mitochondrial genomes in plants, fungi and animals. *New Phytol* 168: 39-50.

601 Barreto, F. S., and R. S. Burton. 2013. Elevated oxidative damage is correlated with reduced  
602 fitness in interpopulation hybrids of a marine copepod. *Proc Biol Sci* 280: 20131521.

603 Bashford, D., C. Chothia, and A. M. Lesk. 1987. Determinants of a protein fold - unique  
604 features of the globin amino acid sequences. *J Mol Biol* 196: 199-216.

605 Birky, C. W., Jr., and J. B. Walsh. 1988. Effects of linkage on rates of molecular evolution.  
606 *Proc Natl Acad Sci USA* 85: 6414-6418.

607 Blier, P. U., F. Dufresne, and R. S. Burton. 2001. Natural selection and the evolution of  
608 mtDNA-encoded peptides: evidence for intergenomic co-adaptation. *Trends Genet* 17:  
609 400-406.

610 Burley, S. K., and G. A. Petsko. 1985. Aromatic-aromatic interaction: a mechanism of protein  
611 structure stabilization. *Science* 229: 23-28.

612 Charlesworth, B. 1993. The evolution of sex and recombination in a varying environment. *J*  
613 *Heredity* 84: 345-350.

614 Charlesworth, B., M. T. Morgan, and D. Charlesworth. 1993. The effect of deleterious  
615 mutations on neutral molecular variation. *Genetics* 134: 1289-1303.

616 Charlesworth, D., and S. I. Wright. 2001. Breeding systems and genome evolution. *Curr Opin*  
617 *Genet Devel* 11: 685-690.

618 Chen, J. H., C. N. Hales, and S. E. Ozanne. 2007. DNA damage, cellular senescence and  
619 organismal ageing: causal or correlative? *Nucl Acids Res* 35: 7417-7428.

620 Covello, P. S., and M. W. Gray. 1989. RNA editing in plant mitochondria. *Nature* 341:  
621 662-666.

622 Cutter, A. D., and B. A. Payseur. 2003. Rates of deleterious mutation and the evolution of sex  
623 in *Caenorhabditis*. *J Evol Biol* 16: 812-822.

624 Das, J., S. T. Miller, and D. L. Stern. 2004. Comparison of diverse protein sequences of the  
625 nuclear-encoded subunits of cytochrome C oxidase suggests conservation of structure  
626 underlies evolving functional sites. *Mol Biol Evol* 21: 1572-1582.

627 Doms, R. W., A. Ruusala, C. Machamer, J. Helenius, A. Helenius, and J. K. Rose. 1988.  
628 Differential effects of mutations in 3 domains on folding, quaternary structure, and  
629 intracellular-transport of vesicular stomatitis virus G-protein. *J Cell Biol* 107: 89-99.

630 Efron, B., and R. J. Tibshirani. 1993. An introduction to the bootstrap, monographs on statistics  
631 and applied probability, Vol. 57. New York and London: Chapman and Hall/CRC.

632 Ellison, C. K., and R. S. Burton. 2006. Disruption of mitochondrial function in interpopulation  
633 hybrids of *Tigriopus californicus*. *Evolution* 60:1382-1391.

634 Eyre-Walker, A., and P. D. Keightley. 2009. Estimating the rate of adaptive molecular  
635 evolution in the presence of slightly deleterious mutations and population size change.  
636 *Mol Biol Evol* 26: 2097-2108.

637 Felsenstein, J. 1985. Phylogenies and the comparative method. *Am Nat* 125: 1-15.

638 Fisher, R. A. 1930. The genetical theory of natural selection. Oxford: The Clarendon Press.

639 Freudenberg-Hua, Y., J. Freudenberg, N. Kluck, S. Cichon, P. Propping, and M. M. Nothen.  
640 2003. Single nucleotide variation analysis in 65 candidate genes for CNS disorders in a  
641 representative sample of the European population. *Gen Res* 13: 2271-2276.

642 Fu, Y. X., and W.H. Li. 1993. Statistical tests of neutrality of mutations. *Genetics* 133: 693-709.

643 Fukami, H., A. F. Budd, D. R. Levitan, J. Jara, R. Kersanach, and N. Knowlton. 2004.  
644 Geographic differences in species boundaries among members of the *Montastraea*  
645 *annularis* complex based on molecular and morphological markers. *Evolution* 58: 324-  
646 337.

647 Gadagkar, S. R., M. S. Rosenberg, and S. Kumar. 2005. Inferring species phylogenies from  
648 multiple genes: Concatenated sequence tree versus consensus gene tree. *J Exper Zool*  
649 *Part B-Mol Devel Evol* 304B: 64-74.

650 Geisler, N., and K. Weber. 1982. The amino acid sequence of chicken muscle desmin provides  
651 a common structural model for intermediate filament proteins. *Embo J* 1: 1649-1656.

652 Grantham, R. 1974. Amino acid difference formula to help explain protein evolution. *Science*  
653 185: 862-864.

654 Gualberto, J. M., L. Lamattina, G. Bonnard, J. H. Weil, and J. M. Grienemberger. 1989. RNA  
655 editing in wheat mitochondria results in the conservation of protein sequences. *Nature*  
656 341: 660-662.

657 Halligan, D. L., A. D. Peters, and P. D. Keightley. 2003. Estimating numbers of EMS-induced  
658 mutations affecting life history traits in *Caenorhabditis elegans* in crosses between inbred  
659 sublines. *Genet Res* 82: 191-205.

660 Hanada, K., S. H. Shiu, and W. H. Li. 2007. The nonsynonymous/synonymous substitution  
661 rate ratio versus the radical/conservative replacement rate ratio in the evolution of  
662 mammalian genes. *Mol Biol Evol* 24: 2235-2241.

663 Henry, L., T. Schwander, and B. J. Crespi. 2012. Deleterious mutation accumulation in  
664 asexual *Timema* stick insects. *Mol Biol Evol* 29: 401-408.

665 Hill, W. G., and A. Robertson. 1966. The effect of linkage on limits to artificial selection.

666 Genet Res 8: 269-294.

667 Hollister, J. D., S. Greiner, W. Wang, J. Wang, Y. Zhang, G. K. Wong, S. I. Wright, and M. T.

668 Johnson. 2015. Recurrent loss of sex is associated with accumulation of deleterious

669 mutations in *Oenothera*. Mol Biol Evol 32: 896-905.

670 Holm, S. 1979. A simple sequentially rejective multiple test procedure. Scand J Statist 65-70.

671 Horandl, E., and D. Hojsgaard. 2012. The evolution of apomixis in angiosperms: A reappraisal.

672 Plant Biosyst 146: 681-693.

673 Jokela, J., C. M. Lively, M. F. Dybdahl, and J. A. Fox. 1997. Evidence for a cost of sex in the

674 freshwater snail *Potamopyrgus antipodarum*. Ecology 78: 452-460.

675 Jukes T. H., and C. R. Cantor. 1969. Evolution of protein molecules. Mammalian Protein

676 Metabolism Vol. 3. New York: Academic Press, Inc.

677 Kaiser, V. B., and B. Charlesworth. 2009. The effects of deleterious mutations on evolution in

678 non-recombining genomes. Trends Genet 25: 9-12.

679 Katju, V., L. B. Packard, L. Bu, P. D. Keightley, and U. Bergthorsson. 2015. Fitness decline

680 in spontaneous mutation accumulation lines of *Caenorhabditis elegans* with varying

681 effective population sizes. Evolution 69: 104-116.

682 Keightley, P. D., and B. Charlesworth. 2005. Genetic instability of *C. elegans* comes naturally.

683 Trends Genet 21: 67-70.

684 Keightley, P. D., and A. Eyre-Walker. 2007. Joint inference of the distribution of fitness effects

685 of deleterious mutations and population demography based on nucleotide polymorphism

686 frequencies. Genetics 177: 2251-2261.

687 Krist, A. C., A. D. Kay, K. Larkin, and M. Neiman. 2014. Response to phosphorus limitation

688 varies among lake populations of the freshwater snail *Potamopyrgus antipodarum*. PLoS

689 ONE 9: e85845.

690 Kryazhimskiy, S., and J. B. Plotkin. 2008. The population genetics of dN/dS. PLoS Genet

691 4: e1000304.

692 Kumar, S., M. Nei, J. Dudley, and K. Tamura. 2008. MEGA: a biologist-centric software for

693 evolutionary analysis of DNA and protein sequences. Brief Bioinform 9: 299-306.

694 Lesk, A. M., and C. Chothia. 1980. How different amino acid sequences determine similar

695 protein structures - structure and evolutionary dynamics of the globins. J Mol Biol 136:

696 225-270.

697 Li, W. H., C. I. Wu, and C. C. Luo. 1985. A new method for estimating synonymous and

698 nonsynonymous rates of nucleotide substitution considering the relative likelihood of

699 nucleotide and codon changes. Mol Biol Evol 2: 150-174.

700 Lively, C. M. 1987. Evidence from a New Zealand snail for the maintenance of sex by

701 parasitism. Nature 328: 519-521.

702 Lynch, M., R. Burger, D. Butcher, and W. Gabriel. 1993. The mutational meltdown in asexual

703 populations. J Heredity 84: 339-344.

704 Maynard Smith, J. 1978. The evolution of sex. London: Cambridge University Press.

705 McDonald, J. H. 1996. Detecting non-neutral heterogeneity across a region of DNA sequence

706 in the ratio of polymorphism to divergence. Mol Biol Evol 13: 253-260.

707 McDonald, J. H., and M. Kreitman. 1991. Adaptive protein evolution at the *Adh* locus in

708 *Drosophila*. Nature 351: 652-654.

709 Meiklejohn, C. D., M. A. Holmbeck, M. A. Siddiq, D. N. Abt, D. M. Rand, and K. L.

710 Montooth. 2013. An incompatibility between a mitochondrial tRNA and its nuclear-

711 encoded tRNA synthetase compromises development and fitness in *Drosophila*. PLoS

712 Genet 9: e1003238.

713 Meiklejohn, C. D., K. L. Montooth, and D. M. Rand. 2007. Positive and negative selection on  
714 the mitochondrial genome. Trends Genet 23: 259-263.

715 Muir, R., A. Diot, and J. Poulton. 2016 Mitochondrial content is central to nuclear gene  
716 expression: Profound implications for human health. Bioessays  
717 doi: 10.1002/bies.201500105.

718 Nakashima, H., K. Nishikawa, and T. Ooi. 1986. The folding type of a protein is relevant to  
719 the amino acid composition. J Biochem 99: 153-162.

720 Nei, M., and T. Gojobori. 1986. Simple methods for estimating the numbers of synonymous  
721 and nonsynonymous nucleotide substitutions. Mol Biol Evol 3: 418-426.

722 Neiman, M., G. Hehman, J. T. Miller, J. M. Logsdon, Jr., and D. R. Taylor. 2010.  
723 Accelerated mutation accumulation in asexual lineages of a freshwater snail. Mol Biol  
724 Evol 27: 954-963.

725 Neiman, M., K. Larkin, A. R. Thompson, and P. Wilton. 2012. Male offspring production by  
726 asexual *Potamopyrgus antipodarum*, a New Zealand snail. Heredity 109: 57-62.

727 Neiman, M., and T.A. Linksvayer. 2006. The conversion of variance and the evolutionary  
728 potential of restricted recombination. Heredity 96: 111-121.

729 Neiman, M., and C. M. Lively. 2004. Pleistocene glaciation is implicated in the  
730 phylogeographical structure of *Potamopyrgus antipodarum*, a New Zealand snail. Mol  
731 Ecol 13: 3085-3098.

732 Neiman, M., D. Paczesniak, D. M. Soper, A. T. Baldwin, and G. Hehman. 2011. Wide  
733 variation in ploidy level and genome size in a New Zealand freshwater snail with  
734 coexisting sexual and asexual lineages. Evolution 65: 3202-3216.



735 Neiman, M., and D. R. Taylor. 2009. The causes of mutation accumulation in mitochondrial  
736 genomes. *Proc Biol Sci* 276: 1201-1209.

737 Normark, B. B., and N. A. Moran. 2000. Opinion - Testing for the accumulation of deleterious  
738 mutations in asexual eukaryote genomes using molecular sequences. *J Nat Hist*, 34:  
739 1719-1729.

740 Ohta, T. 1987. Very slightly deleterious mutations and the molecular clock. *J Mol Evol* 26:  
741 1-6.

742 Paczesniak, D., J. Jokela, K. Larkin, and M. Neiman. 2013. Discordance between nuclear and  
743 mitochondrial genomes in sexual and asexual lineages of the freshwater snail  
744 *Potamopyrgus antipodarum*. *Mol Ecol* 22: 4695-4710.

745 Perutz, M. F., J. C. Kendrew, and H. C. Watson. 1965. Structure and function of haemoglobin  
746 – Some relations between polypeptide chain configuration and amino acid sequence. *J*  
747 *Mol Biol* 13: 669-678.

748 Pichaud, N., J. W. Ballard, R. M. Tanguay, and P. U. Blier. 2013. Mitochondrial haplotype  
749 divergences affect specific temperature sensitivity of mitochondrial respiration. *J*  
750 *Bioenerget Biomembr* 45: 25-35.

751 Pike, T. W., J. D. Blount, B. Bjerkeng, J. Lindstrom, and N. B. Metcalfe. 2007. Carotenoids,  
752 oxidative stress and female mating preference for longer lived males. *Proc Biol Sci*  
753 274: 1591-1596.

754 Popadin, K., L. V. Polishchuk, L. Mamirova, D. Knorre, and K. Gunbin. 2007. Accumulation  
755 of slightly deleterious mutations in mitochondrial protein-coding genes of large versus  
756 small mammals. *Proc Natl Acad Sci USA* 104: 13390-13395.

757 Rand, D. M., R. A. Haney, and A. J. Fry. 2004. Cytonuclear coevolution: the genomics of

758 cooperation. Trends Ecol Evol 19: 645-653.

759 Rand, D. M., D. M. Weinreich, and B. O. Cezairliyan. 2000. Neutrality tests of conservative-  
760 radical amino acid changes in nuclear- and mitochondrially-encoded proteins. Gene 261:  
761 115-125.

762 Rambaut, A. 2007. FigTree, a graphical viewer of phylogenetic trees. See  
763 <http://tree.bio.ed.ac.uk/software/figtree>.

764 Rodriguez, F., J. L. Oliver, A. Marin, and J. R. Medina. 1990. The general stochastic model of  
765 nucleotide substitution. J Theor Biol 142: 485–501.

766 Rokas, A., B. L. Williams, N. King, and S. B. Carroll. 2003. Genome-scale approaches to  
767 resolving incongruence in molecular phylogenies. Nature 425: 798-804.

768 Rumbley, J., L. Hoang, L. Mayne, and S. W. Englander. 2001. An amino acid code for protein  
769 folding. Proc Natl Acad Sci USA 98: 105-112.

770 Sardiello, M., F. Licciulli, D. Catalano, M. Attimonelli, and C. Caggese. 2003. MitoDrome: a  
771 database of *Drosophila melanogaster* nuclear genes encoding proteins targeted to the  
772 mitochondrion. Nucl Acids Res 31: 322-324.

773 Schneider, A., B. Charlesworth, A. Eyre-Walker, and P. D. Keightley. 2011. A method for  
774 inferring the rate of occurrence and fitness effects of advantageous mutations. Genetics  
775 189: 1427-1437.

776 Smith, N. G. 2003. Are radical and conservative substitution rates useful statistics in molecular  
777 evolution? J Mol Evol 57: 467-478.

778 Tajima, F. 1983. Evolutionary relationship of DNA sequences in finite populations. Genetics  
779 105: 437-460.

780 Tajima, F. 1989. The effect of change in population size on DNA polymorphism. Genetics

781           123: 597-601.

782    Tamura, K., and M. Nei. 1993. Estimation of the number of nucleotide substitutions in the

783           control region of mitochondrial DNA in humans and chimpanzees. *Mol Biol Evol* 10:

784           512-526.

785    Tucker, A. E., M. S. Ackerman, B. D. Eads, S. Xu, and M. Lynch. 2013. Population-genomic

786           insights into the evolutionary origin and fate of obligately asexual *Daphnia pulex*. *Proc*

787           Natl Acad Sci USA 110: 15740-15745.

788    Voigt-Zielinski, M. L., M. Piwczynski, and T. F. Sharbel. 2012. Differential effects of

789           polyploidy and diploidy on fitness of apomictic *Boechera*. *Sex Plant Repro* 25: 97-109.

790    von Heijne, G. 1992. Membrane protein structure prediction. Hydrophobicity analysis and the

791           positive-inside rule. *J Mol Biol* 225: 487-494.

792    Watterson, G. A. 1975. On the number of segregating sites in genetical models without

793           recombination. *Theor Popul Biol* 7: 256-276.

794    Werle, E., C. Schneider, M. Renner, M. Volker, and W. Fiehn. 1994. Convenient single step,

795           one tube purification of PCR products for direct sequencing. *Nucl Acids Res* 22:

796           4354-4355.

797    Wright, C. F., S. A. Teichmann, J. Clarke, and C. M. Dobson. 2005. The importance of

798           sequence diversity in the aggregation and evolution of proteins. *Nature* 438: 878-

799           881.

800    Wright, S. I., N. Nano, J. P. Foxe, and V. U. Dar. 2008. Effective population size and tests of

801           neutrality at cytoplasmic genes in *Arabidopsis*. *Genet Res* 90:119-128.

802    Yampolsky, L. Y., F. A. Kondrashov, and A. S. Kondrashov. 2005. Distribution of the strength

803           of selection against amino acid replacements in human proteins. *Human Mol Genet*

14: 3191-3201.

Yokobori, S., and S. Paabo. 1995. Transfer RNA editing in land snail mitochondria. *Proc Natl Acad Sci USA* 92: 10432-10435.

Zhang, J. 2000. Rates of conservative and radical nonsynonymous nucleotide substitutions in mammalian nuclear genes. *J Mol Evol* 50: 56-68.

**Figure 1. Whole-mt genome maximum likelihood phylogeny for *P. antipodarum* and an outgroup, *P. estuarinus*.** Maximum likelihood-based phylogeny of 23 asexual (red) and eight sexual (blue) *Potamopyrgus antipodarum* lineages using only 3<sup>rd</sup> position nucleotides of the ~11kbp protein-coding region of the mitochondrial genome. Branch support was estimated using 1,000 bootstrap replicates; only bootstrap values >50 are shown. Because clade A represents a particularly distinct group of asexuals (mean pairwise distance between clade A and (clade B, clade C) = 0.035, mean pairwise distance within (clade B, clade C) = 0.013), we removed clade A from the re-analysis of rates and patterns of amino acid sequence evolution; clade C was used as the ingroup and clade B as an outgroup in this analysis.

**Figure 2. Molecular evolution of conservative and radical changes in mt genomes of *P. antipodarum*.** A) Comparison of the Jukes-Cantor-corrected substitution rates across different mutational types. Left: Substitutions per site;  $K_S$  – synonymous,  $K_A$  – nonsynonymous,  $K_C$  – conservative nonsynonymous, and  $K_R$  – radical nonsynonymous. Right: Inset of boxed-in region depicting only  $K_A$ ,  $K_C$ , and  $K_R$ . Error bars represent inner-quartile ranges (IQR). Statistical significance was assessed using a Mann-Whitney U test. B) Ratio of polymorphism to divergence in sites with conservative (white) vs. radical (gray) changes. Ratios for synonymous

(diagonal stripes) and nonsynonymous (black) mutational types are shown for comparison. Error bars represent 95% confidence intervals generated using 10,000 bootstrap replicates. Statistical significance in  $P_C:D_C$  vs.  $P_R:D_R$  was assessed using Fisher's Exact Test. C) Mean synonymous-corrected nucleotide diversity for conservative (white) vs. radical (gray) sites in *P. antipodarum*. Nucleotide diversity at nonsynonymous sites is shown for comparison. Error bars represent 95% confidence intervals generated using 10,000 bootstrap replicates. Asterisks indicate significant differences (\* =  $p < 0.05$ , \*\*\* =  $p < 0.0002$ ).

**Figure 3. Ratios of polymorphism to divergence for conservative and radical changes in sexual vs. asexual lineages of *P. antipodarum*.** Comparison of ratios of polymorphism to divergence for sexual (blue) vs. asexual (red) lineages for conservative (semi-transparent) vs. radical (solid) changes. Error bars indicate 95% CIs generated using 10,000 bootstrap replicates. Lower-case letters indicate statistical groupings determined using the Holm-modified Bonferroni correction for multiple comparisons.

**Figure 4. Mean number of unique polymorphisms per genome ( $\theta_U$ ) for sexual vs. asexual lineages of *P. antipodarum*.** Mean number of conservative (semi-transparent) and radical (solid) unique polymorphisms per site for sexual (blue) vs. asexual (red) lineages of *P. antipodarum*. Error bars indicate 95% CIs generated using 10,000 bootstrap replicates. Lower-case letters indicate statistical groupings determined using the Holm-modified Bonferroni correction for multiple comparisons.

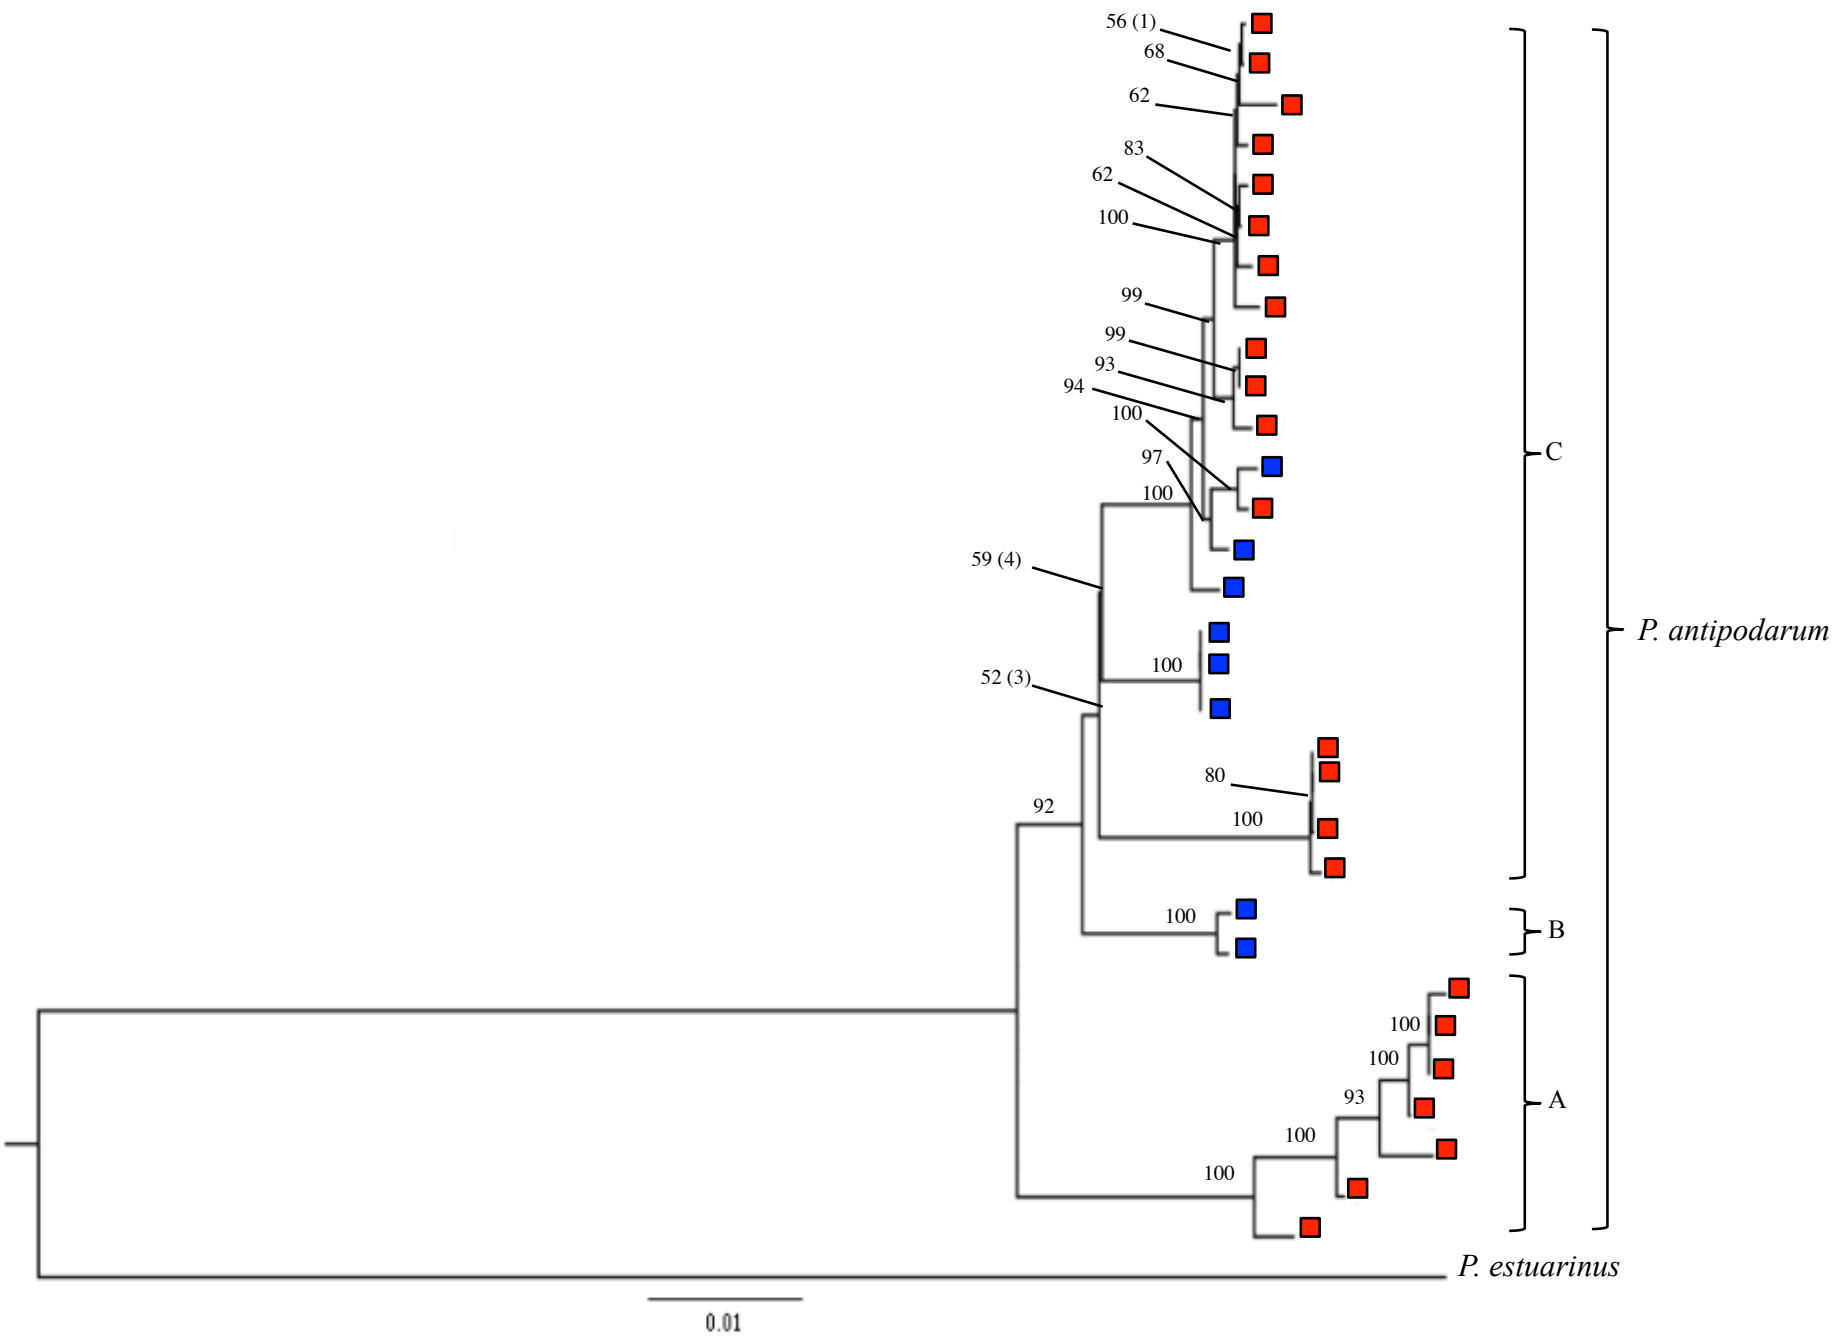

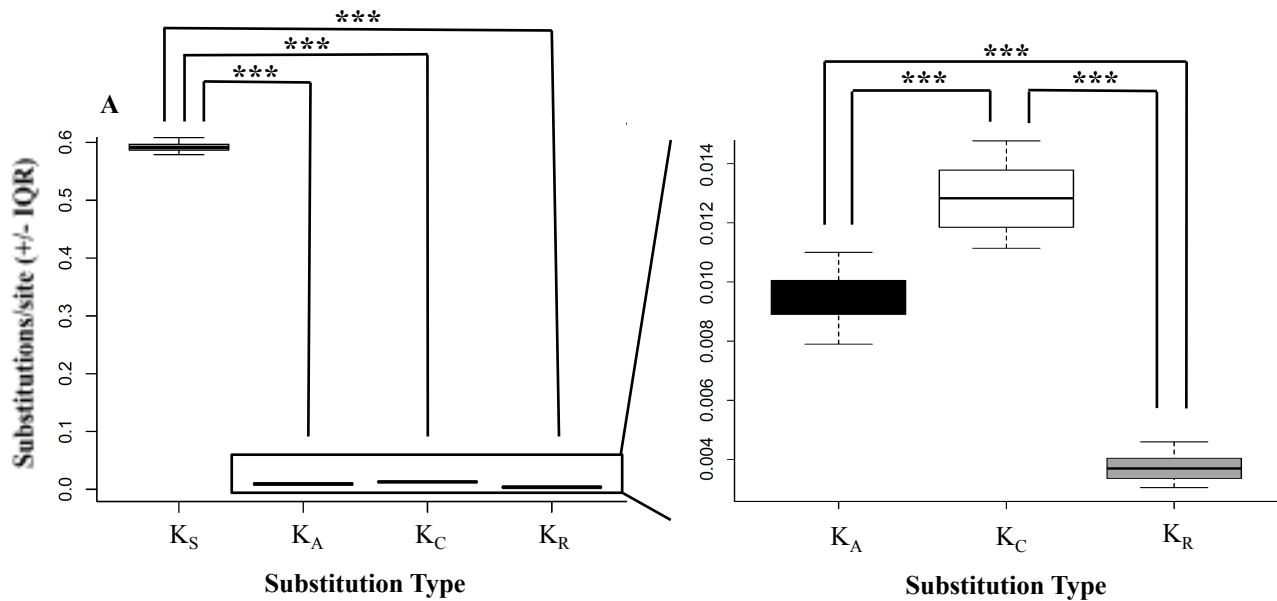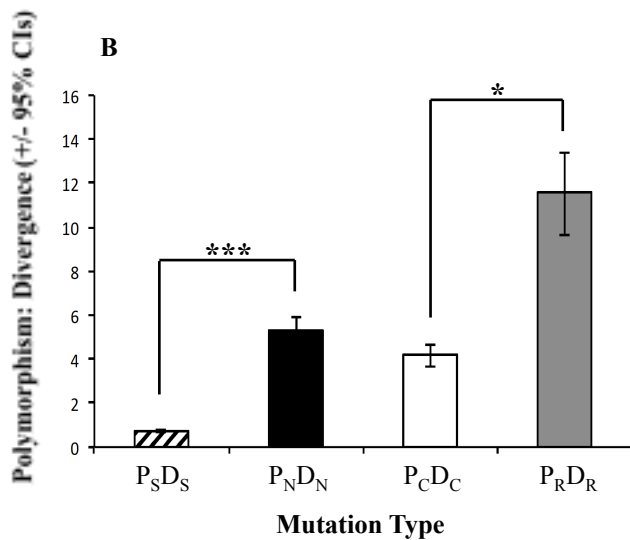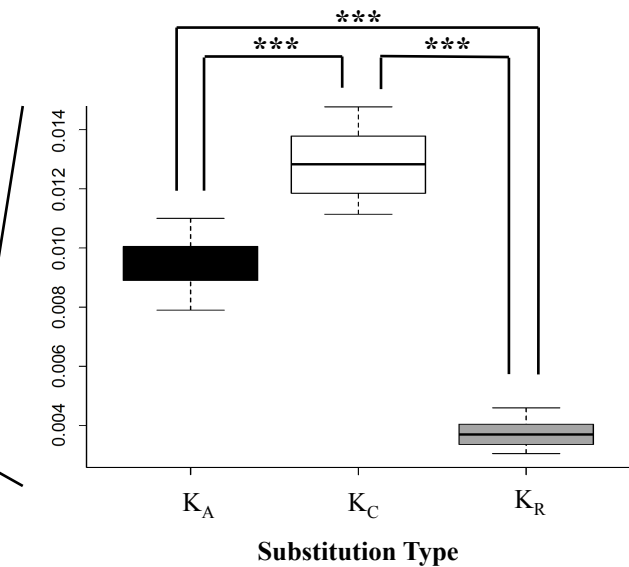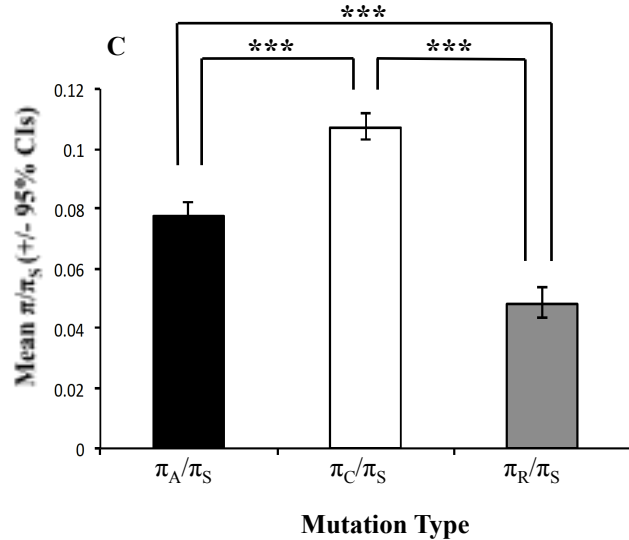

Mean P:D (+/- 95% CIs)

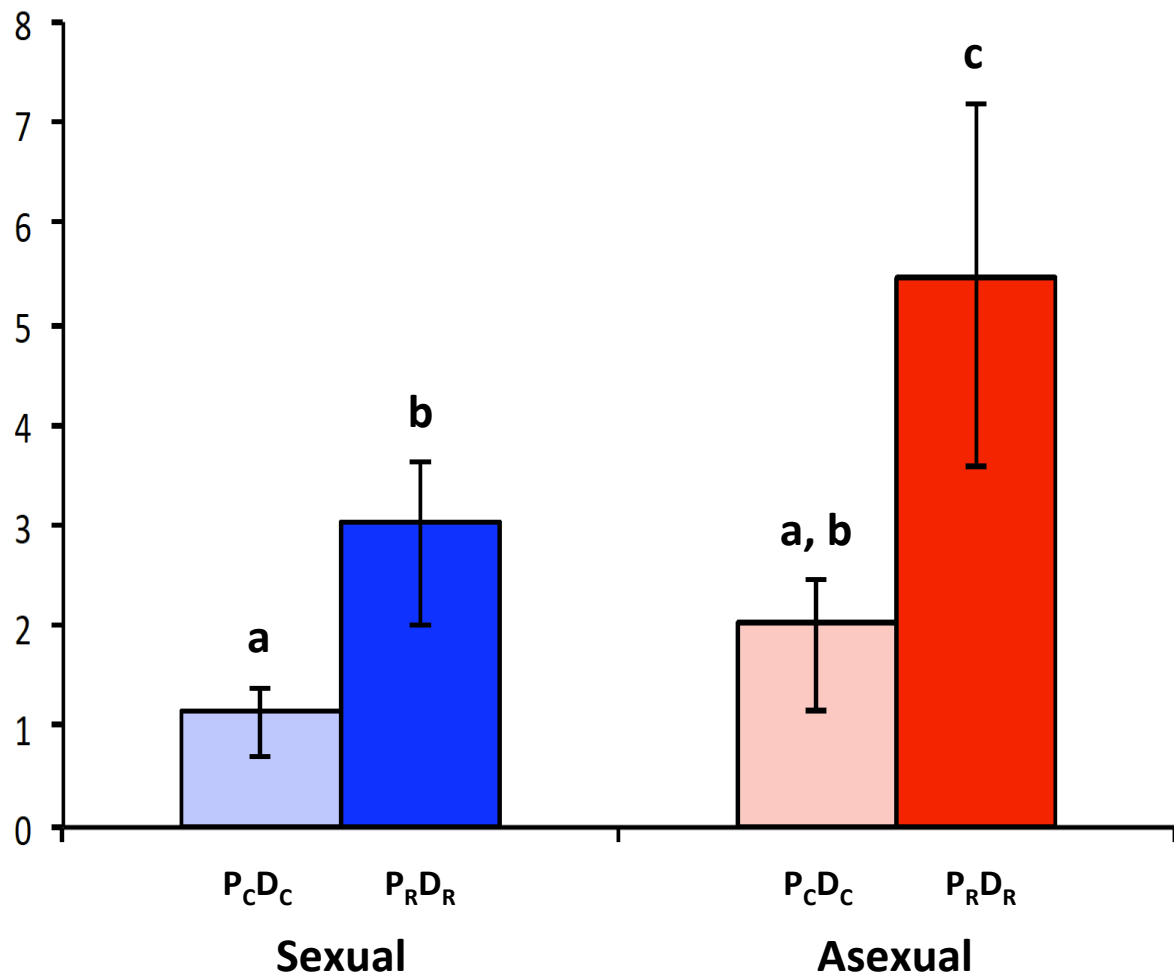



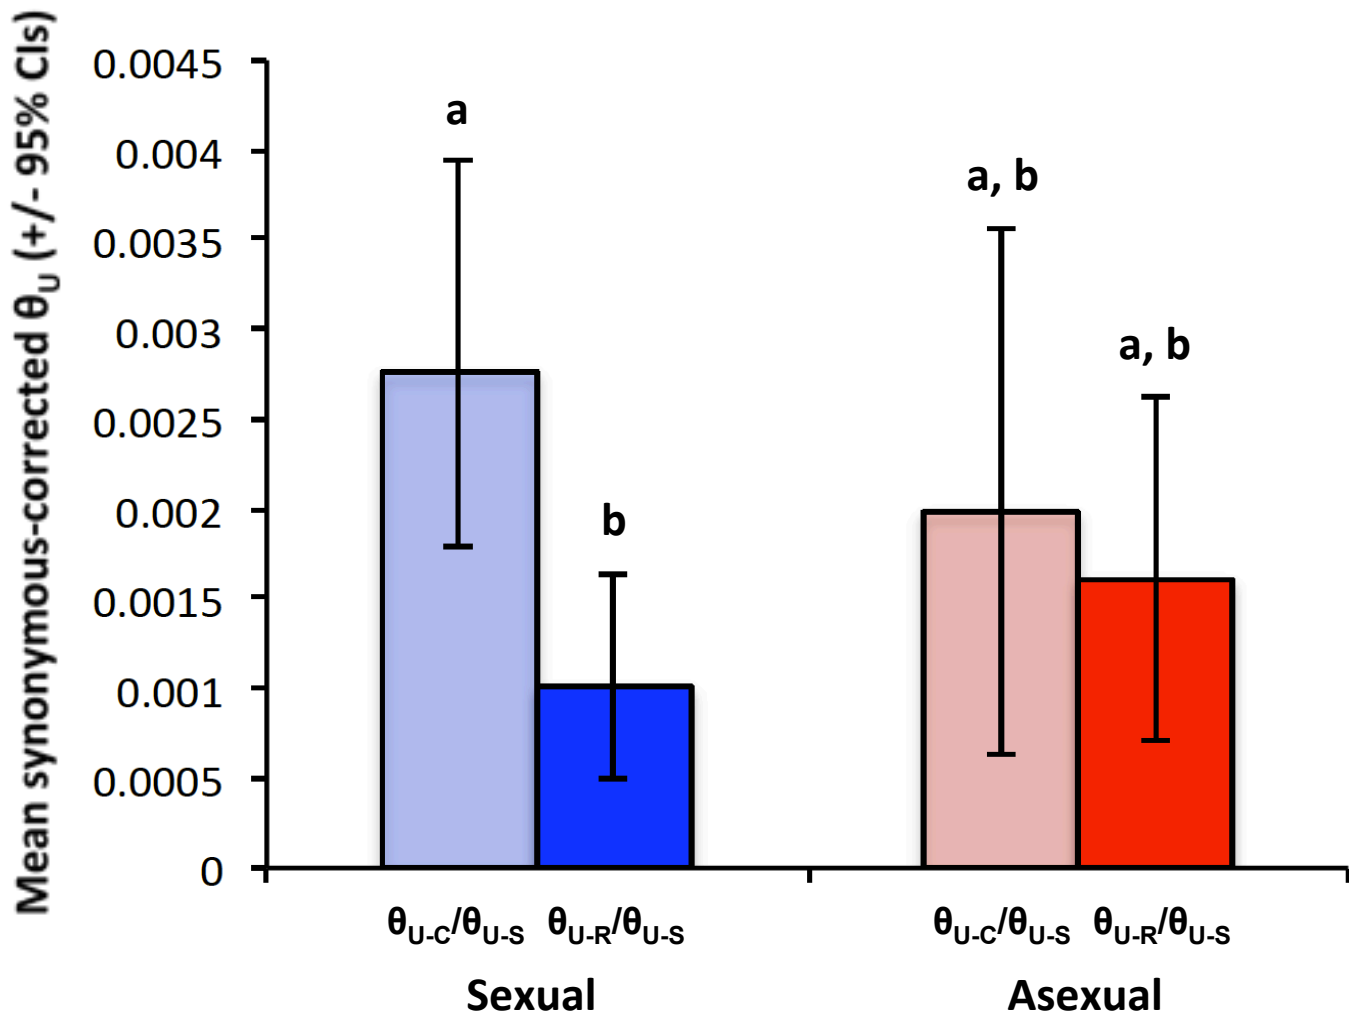

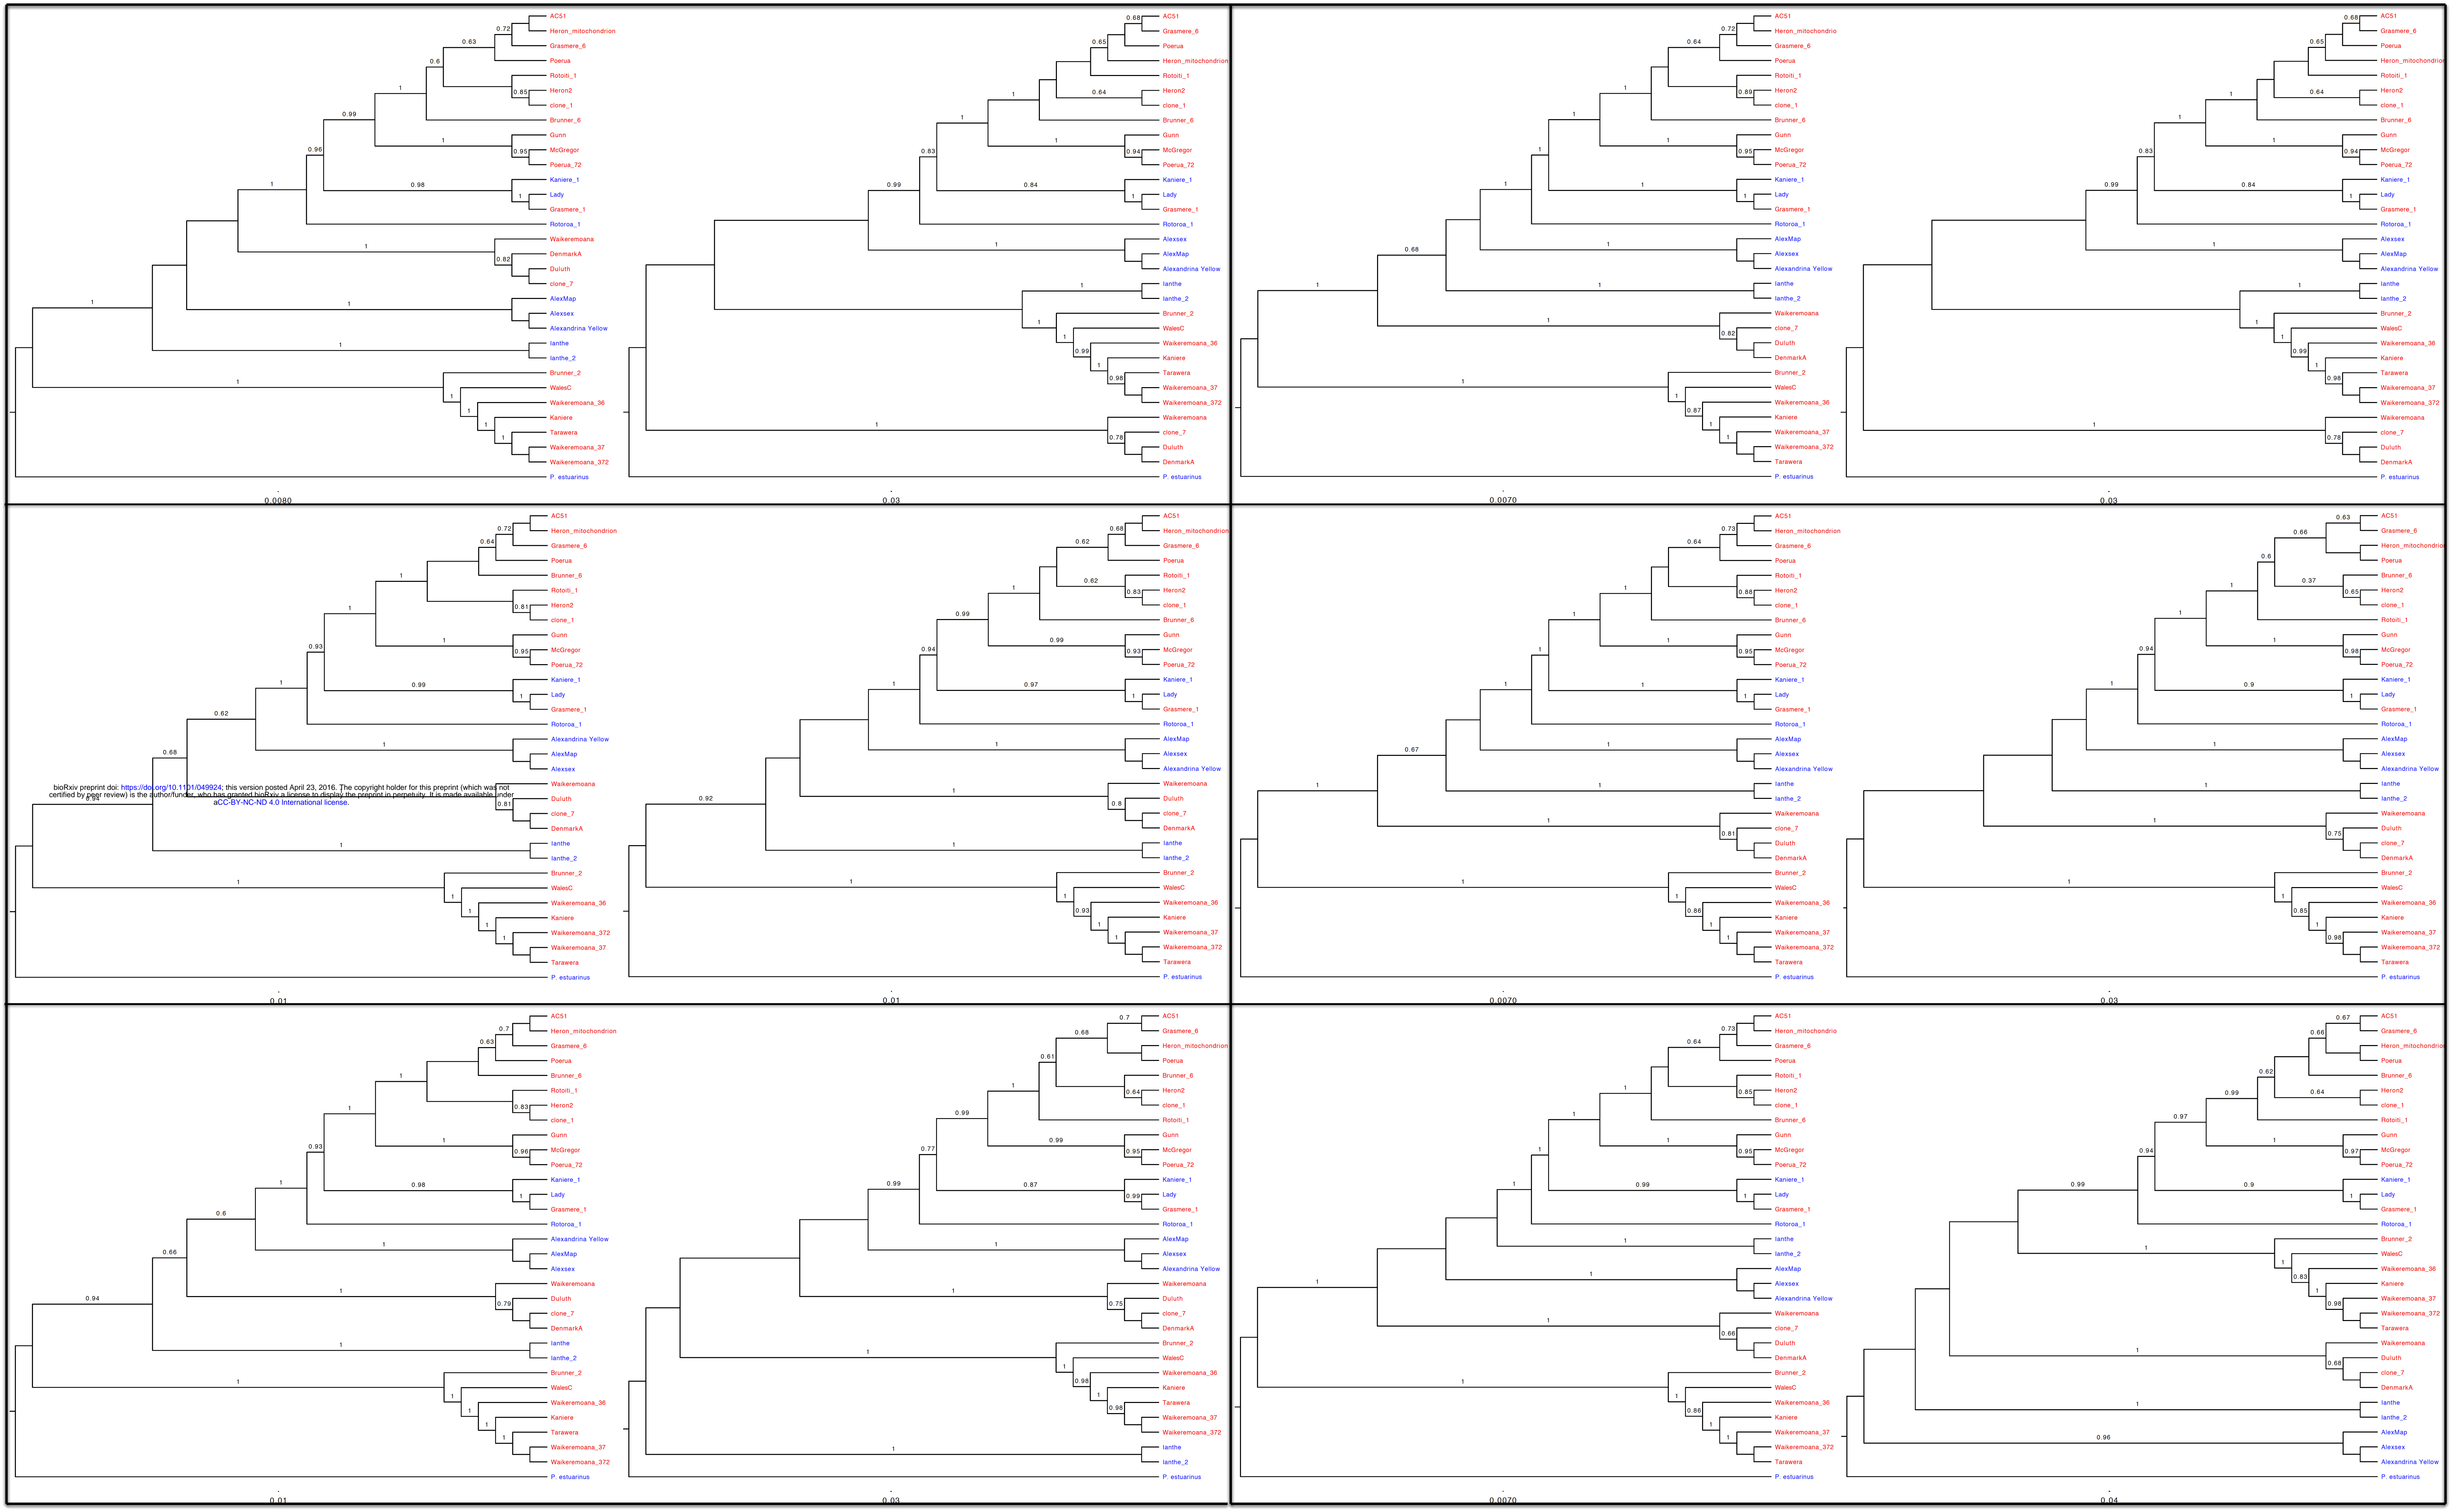

**Table S1. Summary of source populations of *Potamopyrgus antipodarum*.**

| Lake of Origin | Latitude/Longitude     | Reproductive Mode | Ploidy | Sequencing Platform | Reference          |
|----------------|------------------------|-------------------|--------|---------------------|--------------------|
| Alexandrina    | -35.440603, 139.083438 | Sexual            | 2x     | ABI 3730            | Neiman et al. 2010 |
| Alexandrina    | -35.440603, 139.083438 | Sexual            | 2x     | ABI 3730            | Neiman et al. 2010 |
| Alexandrina    | -35.440603, 139.083438 | Sexual            | 2x     | Illumina            | This study         |
| Alexandrina    | -35.440603, 139.083438 | Asexual           | 3x     | ABI 3730            | Neiman et al. 2010 |
| Alexandrina    | -35.440603, 139.083438 | Asexual           | 3x     | ABI 3730            | Neiman et al. 2010 |
| Alexandrina    | -35.440603, 139.083438 | Asexual           | 3x     | ABI 3730            | Neiman et al. 2010 |
| Brunner        | -42.607385, 171.439636 | Asexual           | 3x     | ABI 3730            | This study         |
| Brunner        | -42.607385, 171.439636 | Asexual           | 4x     | ABI 3730            | This study         |
| Denmark        | 56.001158, 9.207968    | Asexual           | 3x     | ABI 3730            | Neiman et al. 2010 |
| Grasmere       | -43.061036, 171.774569 | Asexual           | 3x     | ABI 3730            | This study         |
| Grasmere       | -43.061036, 171.774569 | Asexual           | 4x     | ABI 3730            | This study         |
| Gunn           | -44.874524, 168.090031 | Asexual           | 3x     | ABI 3730            | Neiman et al. 2010 |
| Heron          | -43.481012, 171.169173 | Asexual           | 3x     | ABI 3730            | Neiman et al. 2010 |
| Heron          | -43.481012, 171.169173 | Asexual           | 3x     | ABI 3730            | Neiman et al. 2010 |
| Ianthe         | -43.481012, 171.169173 | Sexual            | 2x     | ABI 3730            | Neiman et al. 2010 |
| Ianthe         | -43.481012, 171.169173 | Sexual            | 2x     | Illumina            | This study         |
| Kaniere        | -43.481012, 171.169173 | Sexual            | 2x     | ABI 3730            | This study         |
| Kaniere        | -43.481012, 171.169173 | Asexual           | 3x     | Illumina            | This study         |
| Lady           | -42.599558, 171.573173 | Sexual            | 2x     | ABI 3730            | Neiman et al. 2010 |
| Lake Superior  | 47.917620, -86.953400  | Asexual           | 3x     | ABI 3730            | Neiman et al. 2010 |
| McGregor       | -43.936019, 170.470227 | Asexual           | 3x     | ABI 3730            | Neiman et al. 2010 |
| Poerua         | -42.702716, 171.495638 | Asexual           | 3x     | Illumina            | This study         |
| Poerua         | -42.702716, 171.495638 | Asexual           | 4x     | ABI 3730, Illumina* | This study         |
| Rotoiti        | -38.037084, 176.345628 | Asexual           | 4x     | ABI 3730            | This study         |
| Rotoroa        | -41.851912, 172.642727 | Sexual            | 2x     | ABI 3730            | This study         |
| Tarawera       | -38.186357, 176.429540 | Asexual           | 3x     | ABI 3730            | Neiman et al. 2010 |
| Waikaremoana   | -38.771011, 177.109841 | Asexual           | 3x     | ABI 3730            | Neiman et al. 2010 |
| Waikaremoana   | -38.771011, 177.109841 | Asexual           | 3x     | ABI 3730            | Neiman et al. 2010 |
| Waikaremoana   | -38.771011, 177.109841 | Asexual           | 3x     | ABI 3730            | Neiman et al. 2010 |
| Waikaremoana   | -38.771011, 177.109841 | Asexual           | 3x     | Illumina            | This study         |
| Wales          | 52.321471, -3.703571   | Asexual           | 3x     | ABI 3730            | Neiman et al. 2010 |

\* – Same DNA extraction was sequenced on both platforms

**Table S2. Primers used to amplify and sequence whole mtDNA in *P. antipodarum*.**

| Fragment   | Forward                        | Reverse                      |
|------------|--------------------------------|------------------------------|
| PCR        |                                |                              |
| 1          | 5'-GAGGTAGGAGACTGTAGT-3'       | 5'-GAGTCCTAAGCCCAATGCA-3'    |
| 2          | 5'-GCTAGTATGAATGGTTTGACG-3'    | 5'-GTTATGGCAGCAATAGTAATTG-3' |
| 3          | 5'-TCAGCTTGTGGATCTGA-3'        | 5'-GCCTAATCAGTATGAGGAAG-3'   |
| 4          | 5'-GGAGTGAACGGAAATCA-3'        | 5'-CTCTTGAGTATGCTGAGTACA-3'  |
| Sequencing |                                |                              |
| 1.1        | 5'TATGAATATTCAGATTTTTTAAATA-3' | 5'-CTGCCACCTTTATTATAAAG-3'   |
| 1.2        | 5'-GGCTCATAGTTTACTTAACTT-3'    | 5'-CGTCAAACCATTTCATACTAGC-3' |
| 1.3        | 5'-GCGGTTAGACCACGAAG-3'        | 5'-AACTAATAGATGTTTCTATG-3'   |
| 1.4        | 5'-CATAGAAACATCTATTAGTT-3'     | 5'-CTAATCCCAGTTTCCCTC-3'     |
| 2.1        | 5'-GTCTCTCTCTAATTTTATAG-3'     | 5'-GCTGATAGATGAAAGTCTC-3'    |
| 2.2        | 5'-CTCTCCTTATTTTTTAGCC-3'      | 5'-ATATTTGCAGGAATTCAGTG-3'   |
| 2.3        | 5'-GCATTGGAAGCTAAAGAC-3'       | 5'-GTTAACAGCTTCTGTTCG-3'     |
| 2.4        | 5'-CAGCACACTTGAAACATTG-3'      | 5'-CTCATATCTTGCTGCAAC-3'     |
| 3.1        | 5'-CTTCATCAATTAGCGCTTTATTT-3'  | 5'-GTGAAAGAAATCTTAGCCTA-3'   |
| 3.2        | 5'-CTTTCTACCTTAAGCCAGCTAG-3'   | 5'-GTACTAAGCCCCTAAAGGCAA-3'  |
| 3.3        | 5'-CAGCACAGCCTTTAACTAAG-3'     | 5'CTAAATGAAAGGGGTTACG-3'     |
| 3.4        | 5'-CCGCTAAATCCATTGGAAG-3'      | 5'-GTCATCCCTGTAGCTAG-3'      |
| 4.1        | 5'-CTATTGTAGTTATATTGTTGG-3'    | 5'-GAGATATTACAAGCGGTG-3'     |
| 4.2        | 5'-CAATTTCTTCCTCATACTGATT-3'   | 5'-CCTTAACTCCTAATCTTGGTAC-3' |
| 4.3        | 5'-TTAGGGTGGATGCTATTTGC-3'     | 5'-GATACAAGAGCCTCTCATAC-3'   |
| 4.4        | 5'-GATTTAGCTATTTTTTCATTAC-3'   | 5'-CTGTTGTAATAAAGTTTACTG-3'  |

Table S4. Number of sites for different mutational types across seven amino acid classification schemes in the invertebrate mitochondrial genetic code.

|           |            |                 |                 | 1               |                 | 2               |                 | 3               |                 | 4               |                 | 5               |                 | 6               |                 | 7               |                 |
|-----------|------------|-----------------|-----------------|-----------------|-----------------|-----------------|-----------------|-----------------|-----------------|-----------------|-----------------|-----------------|-----------------|-----------------|-----------------|-----------------|-----------------|
| Codon     | Amino Acid | Synonymous      | Nonsynonymous   | Radical         | Conservative    | Radical         | Conservative    | Radical         | Conservative    | Radical         | Conservative    | Radical         | Conservative    | Radical         | Conservative    | Radical         | Conservative    |
| TTT       | F          | 0.33            | 2.67            | 0.00            | 2.67            | 1.00            | 1.67            | 2.33            | 0.33            | 2.33            | 0.33            | 2.33            | 0.33            | 1.00            | 1.67            | 1.00            | 1.67            |
| TTC       | F          | 0.33            | 2.67            | 0.00            | 2.67            | 1.00            | 1.67            | 2.33            | 0.33            | 2.33            | 0.33            | 2.33            | 0.33            | 1.00            | 1.67            | 1.00            | 1.67            |
| TTA       | L          | 0.67            | 2.33            | 0.33            | 2.00            | 0.67            | 1.67            | 1.67            | 0.67            | 1.67            | 0.67            | 1.33            | 1.00            | 0.67            | 1.67            | 0.67            | 1.67            |
| TTG       | L          | 0.67            | 2.33            | 0.33            | 2.00            | 0.67            | 1.67            | 1.67            | 0.67            | 1.67            | 0.67            | 1.33            | 1.00            | 0.67            | 1.67            | 0.67            | 1.67            |
| TTG       | M†         | 0.67            | 2.33            | 0.33            | 2.00            | 0.67            | 1.67            | 1.67            | 0.67            | 1.67            | 0.67            | 1.33            | 1.00            | 0.67            | 1.67            | 0.67            | 1.67            |
| TCT       | S          | 1.00            | 2.00            | 0.00            | 2.00            | 1.00            | 1.00            | 1.00            | 1.00            | 0.67            | 1.33            | 0.67            | 1.33            | 1.00            | 1.00            | 1.00            | 1.00            |
| TCC       | S          | 1.00            | 2.00            | 0.00            | 2.00            | 1.00            | 1.00            | 1.00            | 1.00            | 0.67            | 1.33            | 0.67            | 1.33            | 1.00            | 1.00            | 1.00            | 1.00            |
| TCA       | S          | 1.00            | 2.00            | 0.33            | 1.67            | 1.67            | 0.33            | 1.00            | 1.00            | 1.00            | 1.00            | 0.67            | 1.33            | 1.67            | 0.33            | 1.67            | 0.33            |
| TCG       | S          | 1.00            | 2.00            | 0.33            | 1.67            | 1.67            | 0.33            | 1.00            | 1.00            | 1.00            | 1.00            | 0.67            | 1.33            | 1.67            | 0.33            | 1.67            | 0.33            |
| TAT       | Y          | 0.33            | 2.67            | 1.33            | 1.33            | 1.00            | 1.67            | 2.33            | 0.33            | 2.00            | 0.67            | 2.33            | 0.33            | 1.67            | 1.00            | 1.67            | 1.00            |
| TAC       | Y          | 0.33            | 2.67            | 1.33            | 1.33            | 1.00            | 1.67            | 2.33            | 0.33            | 2.00            | 0.67            | 2.33            | 0.33            | 1.67            | 1.00            | 1.67            | 1.00            |
| TAA       | *          | 0.33            | 2.67            | 2.67            | 0.00            | 2.67            | 0.00            | 2.67            | 0.00            | 2.67            | 0.00            | 2.67            | 0.00            | 2.67            | 0.00            | 2.67            | 0.00            |
| TAG       | *          | 0.33            | 2.67            | 2.67            | 0.00            | 2.67            | 0.00            | 2.67            | 0.00            | 2.67            | 0.00            | 2.67            | 0.00            | 2.67            | 0.00            | 2.67            | 0.00            |
| TGT       | C          | 0.33            | 2.67            | 0.33            | 2.33            | 1.00            | 1.67            | 2.67            | 0.00            | 1.67            | 1.00            | 1.67            | 1.00            | 1.67            | 1.00            | 1.33            | 1.33            |
| TGC       | C          | 0.33            | 2.67            | 0.33            | 2.33            | 1.00            | 1.67            | 2.67            | 0.00            | 1.67            | 1.00            | 1.67            | 1.00            | 1.67            | 1.00            | 1.33            | 1.33            |
| TGA       | W          | 0.33            | 2.67            | 0.67            | 2.00            | 2.33            | 0.33            | 2.67            | 0.00            | 2.33            | 0.33            | 2.67            | 0.00            | 2.00            | 0.67            | 2.33            | 0.33            |
| TGG       | W          | 0.33            | 2.67            | 0.67            | 2.00            | 2.33            | 0.33            | 2.67            | 0.00            | 2.33            | 0.33            | 2.67            | 0.00            | 2.00            | 0.67            | 2.33            | 0.33            |
| CTT       | L          | 1.00            | 2.00            | 0.67            | 1.33            | 0.67            | 1.33            | 1.33            | 0.67            | 1.33            | 0.67            | 1.00            | 1.00            | 0.67            | 1.33            | 0.67            | 1.33            |
| CTC       | L          | 1.00            | 2.00            | 0.67            | 1.33            | 0.67            | 1.33            | 1.33            | 0.67            | 1.33            | 0.67            | 1.00            | 1.00            | 0.67            | 1.33            | 0.67            | 1.33            |
| CTA       | L          | 1.33            | 1.67            | 0.33            | 1.33            | 0.67            | 1.00            | 1.00            | 0.67            | 1.00            | 0.67            | 0.33            | 1.33            | 0.67            | 1.00            | 0.67            | 1.00            |
| CTG       | L          | 1.33            | 1.67            | 0.33            | 1.33            | 0.67            | 1.00            | 1.00            | 0.67            | 1.00            | 0.67            | 0.33            | 1.33            | 0.67            | 1.00            | 0.67            | 1.00            |
| CCT       | P          | 1.00            | 2.00            | 0.67            | 1.33            | 1.33            | 0.67            | 1.00            | 1.00            | 1.00            | 1.00            | 0.67            | 1.33            | 1.33            | 0.67            | 1.33            | 0.67            |
| CCC       | P          | 1.00            | 2.00            | 0.67            | 1.33            | 1.33            | 0.67            | 1.00            | 1.00            | 1.00            | 1.00            | 0.67            | 1.33            | 1.33            | 0.67            | 1.33            | 0.67            |
| CCA       | P          | 1.00            | 2.00            | 0.33            | 1.67            | 1.33            | 0.67            | 1.00            | 1.00            | 1.00            | 1.00            | 0.33            | 1.67            | 1.33            | 0.67            | 1.33            | 0.67            |
| CCG       | P          | 1.00            | 2.00            | 0.33            | 1.67            | 1.33            | 0.67            | 1.00            | 1.00            | 1.00            | 1.00            | 0.33            | 1.67            | 1.33            | 0.67            | 1.33            | 0.67            |
| CAT       | H          | 0.33            | 2.67            | 2.33            | 0.33            | 0.67            | 2.00            | 2.33            | 0.33            | 1.33            | 1.33            | 2.33            | 0.33            | 2.33            | 0.33            | 2.33            | 0.33            |
| CAC       | H          | 0.33            | 2.67            | 2.33            | 0.33            | 0.67            | 2.00            | 2.33            | 0.33            | 1.33            | 1.33            | 2.33            | 0.33            | 2.33            | 0.33            | 2.33            | 0.33            |
| CAA       | Q          | 0.33            | 2.67            | 2.00            | 0.67            | 1.00            | 1.67            | 2.33            | 0.33            | 1.33            | 1.33            | 2.00            | 0.67            | 2.67            | 0.00            | 2.67            | 0.00            |
| CAG       | Q          | 0.33            | 2.67            | 2.00            | 0.67            | 1.00            | 1.67            | 2.33            | 0.33            | 1.33            | 1.33            | 2.00            | 0.67            | 2.67            | 0.00            | 2.67            | 0.00            |
| CGT       | R          | 1.00            | 2.00            | 1.67            | 0.33            | 0.67            | 1.33            | 1.67            | 0.33            | 1.67            | 0.33            | 1.67            | 0.33            | 1.67            | 0.33            | 1.67            | 0.33            |
| CGC       | R          | 0.67            | 2.33            | 2.00            | 0.33            | 0.67            | 1.33            | 2.00            | 0.33            | 1.67            | 0.33            | 1.67            | 0.33            | 2.00            | 0.33            | 1.67            | 0.33            |
| CGA       | R          | 1.00            | 2.00            | 2.00            | 0.00            | 1.00            | 1.00            | 2.00            | 0.00            | 1.33            | 0.67            | 2.00            | 0.00            | 2.00            | 0.00            | 2.00            | 0.00            |
| CGG       | R          | 1.00            | 2.00            | 2.00            | 0.00            | 1.00            | 1.00            | 2.00            | 0.00            | 1.33            | 0.67            | 2.00            | 0.00            | 2.00            | 0.00            | 2.00            | 0.00            |
| ATT       | I          | 0.33            | 2.67            | 0.00            | 2.67            | 1.00            | 1.67            | 1.33            | 1.33            | 1.33            | 1.33            | 0.33            | 2.33            | 1.00            | 1.67            | 1.00            | 1.67            |
| ATT       | M†         | 1.00            | 2.00            | 0.00            | 2.00            | 1.00            | 1.00            | 1.33            | 0.67            | 1.33            | 0.67            | 0.33            | 1.67            | 1.00            | 1.00            | 1.00            | 1.00            |
| ATC       | I          | 0.33            | 2.67            | 0.00            | 2.67            | 1.00            | 1.67            | 1.33            | 1.33            | 1.33            | 1.33            | 0.33            | 2.33            | 1.00            | 1.67            | 1.00            | 1.67            |
| ATC       | M†         | 1.00            | 2.00            | 0.00            | 2.00            | 1.00            | 1.00            | 1.33            | 0.67            | 1.33            | 0.67            | 0.33            | 1.67            | 1.00            | 1.00            | 1.00            | 1.00            |
| ATA       | M          | 0.33            | 2.67            | 0.33            | 2.33            | 1.00            | 1.67            | 1.00            | 1.67            | 1.00            | 1.67            | 0.33            | 2.33            | 1.00            | 1.67            | 1.00            | 1.67            |
| ATA       | M†         | 1.00            | 2.00            | 0.33            | 1.67            | 1.00            | 1.00            | 1.00            | 1.00            | 1.00            | 1.00            | 0.33            | 1.67            | 1.00            | 1.00            | 1.00            | 1.00            |
| ATG       | M          | 0.33            | 2.67            | 0.33            | 2.33            | 1.00            | 1.67            | 1.00            | 1.67            | 1.00            | 1.67            | 0.33            | 2.33            | 1.00            | 1.67            | 1.00            | 1.67            |
| ATG       | M†         | 1.67            | 1.33            | 0.33            | 1.00            | 1.00            | 0.33            | 1.00            | 0.33            | 1.00            | 0.33            | 0.33            | 1.00            | 1.00            | 0.33            | 1.00            | 0.33            |
| ACT       | T          | 1.00            | 2.00            | 0.00            | 2.00            | 1.00            | 1.00            | 0.67            | 1.33            | 0.33            | 1.67            | 0.00            | 2.00            | 1.00            | 1.00            | 1.00            | 1.00            |
| ACC       | T          | 1.00            | 2.00            | 0.00            | 2.00            | 1.00            | 1.00            | 0.67            | 1.33            | 0.33            | 1.67            | 0.00            | 2.00            | 1.00            | 1.00            | 1.00            | 1.00            |
| ACA       | T          | 1.00            | 2.00            | 0.33            | 1.67            | 1.00            | 1.00            | 0.67            | 1.33            | 0.67            | 1.33            | 0.33            | 1.67            | 1.33            | 0.67            | 1.33            | 0.67            |
| ACG       | T          | 1.00            | 2.00            | 0.33            | 1.67            | 1.00            | 1.00            | 0.67            | 1.33            | 0.67            | 1.33            | 0.33            | 1.67            | 1.33            | 0.67            | 1.33            | 0.67            |
| AAT       | N          | 0.33            | 2.67            | 1.33            | 1.33            | 0.33            | 2.33            | 2.33            | 0.33            | 2.00            | 0.67            | 1.67            | 1.00            | 1.67            | 1.00            | 1.67            | 1.00            |
| AAC       | N          | 0.33            | 2.67            | 1.33            | 1.33            | 0.33            | 2.33            | 2.33            | 0.33            | 2.00            | 0.67            | 1.67            | 1.00            | 1.67            | 1.00            | 1.67            | 1.00            |
| AAA       | K          | 0.33            | 2.67            | 2.67            | 0.00            | 0.67            | 2.00            | 2.67            | 0.00            | 2.33            | 1.30            | 2.67            | 0.00            | 2.67            | 0.00            | 2.67            | 0.00            |
| AAG       | K          | 0.33            | 2.67            | 2.67            | 0.00            | 0.67            | 2.00            | 2.67            | 0.00            | 2.33            | 1.30            | 2.67            | 0.00            | 2.67            | 0.00            | 2.67            | 0.00            |
| AGT       | S          | 1.00            | 2.00            | 0.33            | 1.67            | 0.33            | 1.67            | 1.33            | 0.67            | 0.67            | 1.33            | 0.33            | 1.67            | 1.00            | 1.00            | 0.67            | 1.33            |
| AGC       | S          | 1.00            | 2.00            | 0.33            | 1.67            | 0.33            | 1.67            | 1.33            | 0.67            | 0.67            | 1.33            | 0.33            | 1.67            | 1.00            | 1.00            | 0.67            | 1.33            |
| AGA       | S          | 1.00            | 2.00            | 0.67            | 1.33            | 0.67            | 1.33            | 1.33            | 0.67            | 1.33            | 0.67            | 1.00            | 1.00            | 1.67            | 0.33            | 1.33            | 0.67            |
| AGG       | S          | 1.00            | 2.00            | 0.67            | 1.33            | 0.67            | 1.33            | 1.33            | 0.67            | 1.33            | 0.67            | 1.00            | 1.00            | 1.67            | 0.33            | 1.33            | 0.67            |
| GTT       | V          | 1.00            | 2.00            | 0.33            | 1.67            | 0.67            | 1.33            | 1.33            | 0.67            | 1.33            | 0.67            | 0.67            | 1.33            | 0.33            | 1.67            | 0.67            | 1.33            |
| GTC       | V          | 1.00            | 2.00            | 0.33            | 1.67            | 0.67            | 1.33            | 1.33            | 0.67            | 1.33            | 0.67            | 0.67            | 1.33            | 0.33            | 1.67            | 0.67            | 1.33            |
| GTA       | V          | 1.00            | 2.00            | 0.33            | 1.67            | 0.67            | 1.33            | 1.00            | 1.00            | 1.00            | 1.00            | 0.33            | 1.67            | 0.33            | 1.67            | 0.67            | 1.33            |
| GTG       | V          | 1.00            | 2.00            | 0.33            | 1.67            | 0.67            | 1.33            | 1.00            | 1.00            | 1.00            | 1.00            | 0.33            | 1.67            | 0.33            | 1.67            | 0.67            | 1.33            |
| GTG       | M†         | 0.67            | 2.33            | 0.33            | 2.00            | 0.67            | 1.67            | 1.00            | 1.33            | 1.00            | 1.33            | 0.33            | 2.00            | 0.33            | 2.00            | 0.67            | 1.67            |
| GCT       | A          | 1.00            | 2.00            | 0.33            | 1.67            | 1.33            | 0.67            | 0.67            | 1.33            | 0.67            | 1.33            | 0.33            | 1.67            | 1.00            | 1.00            | 1.33            | 0.67            |
| GCC       | A          | 1.00            | 2.00            | 0.33            | 1.67            | 1.33            | 0.67            | 0.67            | 1.33            | 0.67            | 1.33            | 0.33            | 1.67            | 1.00            | 1.00            | 1.33            | 0.67            |
| GCA       | A          | 1.00            | 2.00            | 0.33            | 1.67            | 1.33            | 0.67            | 0.67            | 1.33            | 0.67            | 1.33            | 0.33            | 1.67            | 1.00            | 1.00            | 1.33            | 0.67            |
| GCG       | A          | 1.00            | 2.00            | 0.33            | 1.67            | 1.33            | 0.67            | 0.67            | 1.33            | 0.67            | 1.33            | 0.33            | 1.67            | 1.00            | 1.00            | 1.33            | 0.67            |
| GAT       | D          | 0.33            | 2.67            | 2.00            | 0.67            | 0.67            | 2.00            | 1.67            | 1.00            | 2.00            | 0.67            | 2.00            | 0.67            | 2.00            | 0.67            | 2.00            | 0.67            |
| GAC       | D          | 0.33            | 2.67            | 2.00            | 0.67            | 0.67            | 2.00            | 1.67            | 1.00            | 2.00            | 0.67            | 2.00            | 0.67            | 2.00            | 0.67            | 2.00            | 0.67            |
| GAA       | E          | 0.33            | 2.67            | 2.00            | 0.67            | 1.00            | 1.67            | 1.67            | 1.00            | 2.00            | 0.67            | 2.00            | 0.67            | 2.00            | 0.67            | 2.00            | 0.67            |
| GAG       | E          | 0.33            | 2.67            | 2.00            | 0.67            | 1.00            | 1.67            | 1.67            | 1.00            | 2.00            | 0.67            | 2.00            | 0.67            | 2.00            | 0.67            | 2.00            | 0.67            |
| GGT       | G          | 1.00            | 2.00            | 0.67            | 1.33            | 0.67            | 1.33            | 1.33            | 0.67            | 1.00            | 1.00            | 0.67            | 1.33            | 1.33            | 0.67            | 1.33            | 0.67            |
| GGC       | G          | 1.00            | 2.00            | 0.67            | 1.33            | 0.67            | 1.33            | 1.33            | 0.67            | 1.00            | 1.00            | 0.67            | 1.33            | 1.33            | 0.67            | 1.33            | 0.67            |
| GGA       | G          | 1.00            | 2.00            | 0.67            | 1.33            | 1.00            | 1.00            | 1.33            | 0.67            | 1.33            | 0.67            | 1.00            | 1.00            | 1.00            | 1.00            | 1.67            | 0.33            |
| GGG       | G          | 1.00            | 2.00            | 0.67            | 1.33            | 1.00            | 1.00            | 1.33            | 0.67            | 1.33            | 0.67            | 1.00            | 1.00            | 1.00            | 1.00            | 1.67            | 0.33            |
| Mean (SD) |            | 0.75 (+/- 0.35) | 2.25 (+/- 0.35) | 0.82 (+/- 0.82) | 1.43 (+/- 0.71) | 0.99 (+/- 0.47) | 1.26 (+/- 0.54) | 1.54 (+/- 0.65) | 0.71 (+/- 0.45) | 1.36 (+/- 0.57) | 0.91 (+/- 0.40) | 1.15 (+/- 0.85) | 1.10 (+/- 0.66) | 1.37 (+/- 0.64) | 0.88 (+/- 0.53) | 1.41 (+/- 0.61) | 0.84 (+/- 0.52) |
| Total     |            | 52.33           | 157.67          | 57.67           | 100.00          | 69.33           | 88.00           | 107.67          | 50.00           | 95.33           | 63.93           | 80.33           | 77.00           | 96.00           | 61.67           | 98.67           | 58.67           |

\* -- Indicates a stop codon

† -- Indicates case in which a codon is used as a start codon. Codons used as start codons have fewer nonsynonymous sites (mean = 2.00 +/- 0.41) than when they are used at any other time in a given amino acid sequence (mean = 2.50 +/- 0.28) .
